1           **Prenatal Bisphenol A Exposure in Mice Induces Multi-tissue Multi-omics**  
2                           **Disruptions Linking to Cardiometabolic Disorders**

3 Le Shu<sup>1,2¶</sup>, Qingying Meng<sup>1¶</sup>, Brandon Tsai<sup>1</sup>, Graciela Diamente<sup>1</sup>, Yen-wei Chen<sup>3</sup>, Andrew Mikhail<sup>1</sup>, Helen Luk<sup>1</sup>,  
4 Beate Ritz<sup>4,5</sup>, Patrick Allard<sup>5</sup>, and Xia Yang<sup>1,2,3,6\*</sup>

5 <sup>1</sup>Department of Integrative Biology and Physiology, University of California, Los Angeles, CA 90095, USA

6 <sup>2</sup>Molecular, Cellular, and Integrative Physiology Interdepartmental Program, University of California, Los  
7 Angeles, CA 90095, USA

8 <sup>3</sup>Molecular Toxicology Interdepartmental Program, University of California, Los Angeles, CA 90095, USA

9 <sup>4</sup>Department of Epidemiology, Fielding School of Public Health, University of California, Los Angeles, CA  
10 90095, USA

11 <sup>5</sup>Department of Environmental Health Sciences, Fielding School of Public Health, University of California, Los  
12 Angeles, CA 90095, USA

13 <sup>6</sup>Institute for Quantitative and Computational Biosciences, University of California, Los Angeles, CA 90095,  
14 USA

15  
16 **\*Corresponding author:**

17 Email: [xyang123@ucla.edu](mailto:xyang123@ucla.edu) (XY)

18  
19 **¶These authors contributed equally to this work**

## 20 **Abstract**

21 The health impacts of endocrine disrupting chemicals (EDCs) remain debated and their tissue and molecular  
22 targets are poorly understood. Here we leveraged systems biology approaches to assess the target tissues,  
23 molecular pathways, and gene regulatory networks associated with prenatal exposure to the model EDC  
24 Bisphenol A (BPA). Prenatal BPA exposure led to scores of transcriptomic and methylomic alterations in the  
25 adipose, hypothalamus, and liver tissues in mouse offspring, with cross-tissue perturbations in lipid metabolism as  
26 well as tissue-specific alterations in histone subunits, glucose metabolism and extracellular matrix. Network  
27 modeling prioritized main molecular targets of BPA, including *Pparg*, *Hnf4a*, *Esr1*, and *Fasn*. Lastly, integrative  
28 analyses identified the association of BPA molecular signatures with cardiometabolic phenotypes in mouse and  
29 human. Our multi-tissue, multi-omics investigation provides strong evidence that BPA perturbs diverse molecular  
30 networks in central and peripheral tissues, and offers insights into the molecular targets that link BPA to human  
31 cardiometabolic disorders.

32

33

## 34 **Author summary**

35 The inability to pinpoint the mechanistic underpinnings of environmentally-induced diseases likely stems from  
36 the pleiotropic effects of chemicals such as BPA on diverse tissues and molecular space (transcriptome,  
37 epigenome, etc.). This makes it challenging to fully dissect their health impact and merits a call for modern big  
38 data approaches to examine environmental factors. Our data-driven study is the first unbiased, multi-tissue multi-  
39 omic systems biology investigation of the molecular circuitry and mechanisms underlying offspring response to  
40 prenatal BPA exposure. Importantly, the incorporation of network-based modeling allows us to capture novel  
41 players in the regulation of BPA activities *in vivo*, and the integration with human disease association datasets

42 helps bridge the molecular pathways affected by BPA with diverse human diseases. In doing so, our study  
43 provides compelling molecular evidence that developmental BPA exposure significantly perturbs metabolic and  
44 endocrine systems in the offspring, and supports BPA as one of the environmental factors involved in the  
45 developmental origins of health and disease (DOHaD).

## 46 **Introduction**

47 A central concept in the Developmental Origins of Health and Disease (DOHaD) states that adverse  
48 environmental exposure during early developmental stages is an important determinant for later onset adverse  
49 health outcomes, even in the absence of continuous exposure in adulthood [1-3]. BPA is one of the most  
50 influential environmental metabolic disruptors identified to date with widespread exposure in human populations  
51 and likely plays a role in DOHaD. BPA is used in the production of synthetic polymers, including epoxy resins  
52 and polycarbonates [4]. The advantageous mechanical properties of BPA have resulted in its ubiquitous use in  
53 everyday goods such as plastic bottles and inner coating of canned foods [5,6]. BPA exposure has been confirmed  
54 in the majority of human populations [7] and has been linked to body weight, obesity, insulin resistance, diabetes,  
55 metabolic syndrome (MetS), and cardiovascular diseases in both human epidemiologic and animal studies [8-15].  
56 Importantly, it has been suggested that the developing fetus is particularly vulnerable to BPA exposure [8,16].  
57 Intrauterine growth retardation (IUGR) has been consistently observed after developmental BPA exposure at  
58 intake doses below the suggested human safety level and has been associated with low birth weight, elevated  
59 adult fat weight and altered glucose homeostasis [8,17-20]. As a result, BPA has been banned from baby products  
60 in Europe, Canada, and the US. However, BPA is still in use in non-baby products, posing continuous exposure to  
61 adults. Additionally, BPA has been associated with a transgenerational influence on obesity and MetS [21-23],  
62 contributing to a lingering effect of BPA exposure on future generations even under usage restriction. Together  
63 these lines of evidence support an intriguing hypothesis that BPA may have been playing an important role in the  
64 rise of MetS and cardiometabolic diseases worldwide in the past decades [24-26].

65 Despite numerous findings connecting BPA with adverse health outcomes, there remain ample conflicting data, as  
66 summarized by the European Food Safety Agency [27] and the BPA Joint Emerging Science Working Group of  
67 the US FDA. Although inconsistencies across studies might be attributable to non-monotonic dose response,  
68 exposure window difference, and varying susceptibility between testing models [13,28], there are also several

69 additional layers of complexity and challenges hindering the full dissection of the biological effects of BPA. First,  
70 previous studies examining BPA in various cell types and tissues suggest a broad impact on biological systems  
71 [23,29-31]. Second, BPA has been found to modulate multidimensional molecular events, such as gene  
72 expression and epigenetic changes, that are functionally important for processes such as metabolism and immune  
73 response [32-37]. However, due to most studies being designed to focus on one factor at a time as well as non-  
74 comparable study designs, it is difficult to directly compare effects across tissues or types of molecular data to  
75 derive the molecular rules of sensitivity to BPA exposures. In a recent National Toxicology Program report,  
76 CLARITY-BPA, where multiple organs were examined, evidence of weight gain and cardiac dysfunctions were  
77 observed, however, the study was designed to be solely descriptive and no mechanism of action was proposed.  
78 These research gaps in our understanding of the pleiotropy of EDCs and toxicant biological actions necessitated  
79 the establishment of the NIEHS TaRGET consortium and a more recent call for the research community to  
80 systemically interrogate multiple omics in multiple tissues to accelerate the discovery of key biological  
81 fingerprints of environmental exposure [38].

82 Here we present a multi-tissue, multi-omics systems biology study to examine the systems level influence of  
83 prenatal BPA exposure using modern integrative genomics and network modeling approaches in a mouse model.  
84 We first utilized next-generation sequencing technologies to characterize perturbations in both the transcriptome  
85 and the epigenome across three tissues (white adipose tissue, hypothalamus, liver) in mouse offspring who had  
86 experienced *in utero* exposure to BPA. Based on mounting evidence that genes operate in highly complex tissue-  
87 specific regulatory networks, we hypothesized that prenatal BPA exposure induces genomic and epigenomic  
88 reprogramming in the offspring by affecting the organization and function of tissue-specific gene networks [39-  
89 42]. Using both transcription factor (TF) networks and Bayesian networks, we modeled the dynamics of  
90 transcriptomic and epigenomic signatures and predicted potential regulators that govern the actions of BPA.  
91 Furthermore, the transcriptome, epigenome, and network information was layered upon metabolic phenotypes  
92 such as body weight, adiposity, circulating lipids, and glucose levels in the mouse offspring to evaluate disease

93 association. Lastly, to assess the relevance of the BPA molecular targets identified in our mouse model for human  
94 diseases, we applied integrative genomics to bridge the mouse molecular signatures and genetic disease  
95 association data from human studies. Our study represents a comprehensive data-driven, systems-level  
96 investigation of the molecular and health impact of BPA.

97

## 98 **Methods**

### 99 **Ethics statement**

100 All animal experiments were performed in accordance with the Institutional Animal Care and Use Committee  
101 (IACUC) guidelines. Animal studies and procedures were approved by the Chancellor's Animal Research  
102 Committee of the University of California, Los Angeles (Protocol #2012-059-21).

### 103 **Overall study design**

104 As shown in **Fig 1A**, pregnant C57BL/6 mice were exposed to BPA during gestation via oral gavage at the dosage  
105 of 5mg/kg/day, situated below most reported no-observed-adverse-effect-level (NOAEL) according to toxicity  
106 testing (<https://comptox.epa.gov/dashboard/dsstoxdb/results?search=Bisphenol+A>). This dosage was typically  
107 used in previous studies [23,43-45], and was chosen as a proof-of-concept for our systems biology study design  
108 and to facilitate comparison with previous studies. Male and female offspring (n = 9 for control and n = 11 for  
109 BPA in male; n = 9 for control and n = 13 for BPA in female) of weaning age (3-weeks) were examined for a  
110 spectrum of metabolic phenotypes (detailed below), and euthanized to collect key metabolic tissues including  
111 white adipose tissue, hypothalamus, and liver. We chose the weaning age in order to investigate early molecular  
112 and phenotypic changes in the offspring, which may predispose the offspring to late onset diseases. At the  
113 molecular level, we conducted RNA sequencing (RNA-seq) to evaluate transcriptomic alterations, and  
114 investigated perturbed biological pathways. We also used reduced representation bisulfite sequencing (RRBS) to

115 uncover the epigenomic impact of prenatal BPA exposure at millions of methylation sites and analyzed the  
116 connection of the epigenomic alterations to changes in the transcriptome. We then integrated the transcriptomic  
117 and epigenomic signatures with two types of regulatory networks, namely, transcription factor networks to  
118 identify perturbed TF hotspots, and gene regulatory networks to identify non-TF regulatory genes. Finally, we  
119 interrogated the associations of the transcriptomic and epigenomic signatures of BPA obtained from our study  
120 with metabolic phenotypes in our mouse offspring by correlative analysis, and with human diseases by querying  
121 top reported candidate genes as well as full summary statistics from existing publicly available genome-wide  
122 association studies (GWAS).

### 123 **Mouse model of prenatal BPA exposure**

124 Inbred C57BL/6 mice were maintained on a special diet 5V01 (LabDiet), certified to contain less than 150ppm  
125 estrogenic isoflavones, and housed under standard housing conditions (room temperature 22–24°C) with 12:12 hr  
126 light:dark cycle before mating at 8-10 weeks of age. Upon mating, female mice were randomly assigned to either  
127 the BPA treatment group or the control group. From 1-day post-conception (dpc) to 20 dpc, BPA (Sigma-Aldrich,  
128 St. Louis, MO) dissolved in corn oil was administered to pregnant female mice via oral gavage (mimicking  
129 common exposure route in humans) at 5mg/kg/day on a daily basis. Control mice were fed the same amount of  
130 empty vehicle. BPA exposure was restricted to experimental manipulation through the use of polycarbonate-free  
131 water bottles and cages. Offspring from each treatment were maintained on a standard chow diet (Newco  
132 Distributors Inc, Rancho Cucamonga, CA). Offspring in the vehicle- and BPA-treated groups were derived from 3  
133 and 4 litters by different dams, respectively, to help assess and adjust for litter effects.

### 134 **Characterization of cardiometabolic phenotypes and tissue collection**

135 Body weight of offspring was measured daily from postnatal day 5 up to the weaning age of 3 weeks. Mice were  
136 fasted overnight before sacrifice, and plasma samples were collected through retro-orbital bleeding. Serum lipid  
137 and glucose traits including total cholesterol, high density lipoprotein cholesterol (HDL), un-esterified cholesterol

138 (UC), triglyceride (TG), free fatty acid (FFA), and glucose were measured by enzymatic colorimetric assays at  
139 UCLA GTM Mouse Transfer Core as previously described [40]. Gonadal white adipose tissue, hypothalamus, and  
140 liver tissues were collected from each animal, flash frozen in liquid nitrogen, and stored at  $-80^{\circ}\text{C}$ . For white  
141 adipose tissue, we chose the gonadal depot mainly due to its similarity to abdominal fat, established relevance to  
142 cardiometabolic risks, tissue abundance, and the fact that it is the most well-studied adipose tissue in mouse  
143 models. All mouse experiments were conducted in accordance with and approved by the Institutional Animal  
144 Care and Use Committee at University of California, Los Angeles.

### 145 **RNA sequencing (RNA-seq) and data analysis**

146 A total of 18 RNA samples were isolated from gonadal adipose, hypothalamus and liver tissues ( $n = 3$  per group  
147 per tissue; for each group, mice were randomly selected from litters of different dams in independent cages) from  
148 male offspring using the AllPrep DNA/RNA Mini Kit (QIAGEN GmbH, Hilden, Germany). We focused on  
149 profiling male tissues because of stronger phenotypes observed in males (**Fig 1B-E**). Samples were processed for  
150 library preparation using TruSeq RNA Library Preparation Kit (Illumina, San Diego, CA) for poly-A selection,  
151 fragmentation, and reverse transcription using random hexamer-primers to generate first-strand cDNA. Second-  
152 strand cDNA was generated using RNase H and DNA polymerases, and sequencing adapters were ligated using  
153 the Illumina Paired-End sample prep kit. Library products of 250-400bp fragments were isolated, amplified, and  
154 sequenced with Illumina HiSeq2500 System. After quality control using FastQC [46], the HISAT-StringTie  
155 pipeline [47] was used for sequence alignment and transcript assembly. Identification of differentially expressed  
156 genes (DEGs) were conducted using DEseq2 [48]. To account for multiple testing, we used the q-value method  
157 [49]. After excluding genes with extremely low expression levels ( $\text{FPKM} < 1$ ), only DEGs demonstrating  
158 differential expression comparing the BPA and control groups per tissue at a false discovery rate ( $\text{FDR} < 5\%$ )  
159 were used for biological pathway analysis, network analysis, and phenotypic data integration, as described below.



## 160 **Reduced representation bisulfite sequencing (RRBS) and data analysis**

161 We constructed RRBS libraries for 18 DNA samples from adipose, hypothalamus and liver tissues from male  
162 offspring (n = 3 per group per tissue from the same set of tissues chosen for transcriptome analysis described  
163 above). The DNA samples were quantified using the dsDNA BR assay (Qubit, Waltham, MA) and 100ng of DNA  
164 was used for library preparation. After digestion of the DNA with the MspI enzyme, samples underwent an end-  
165 repair and adenylation process, followed by adapter ligation using the Truseq barcode adapter (Illumina, San  
166 Diego, CA), size selection using AMPure Beads (Beckman Coulter, Brea, CA), and bisulfite treatment using the  
167 Epitect Kit (Qiagen, Germantown, MD). Bisulfite-treated DNA was then amplified using the Truseq Library Prep  
168 Kit (Illumina, San Diego, CA) and sequenced with the Illumina Hiseq2500 System. Bisulfite-converted reads  
169 were processed and aligned to the reference mouse genome (GRCm38/mm10 build) using the bisulfite aligner  
170 BSMAP [50]. We then used MOAB [51] for methylation ratio calling and identification of differentially  
171 methylated CpGs (DMCs). FDR was estimated using the q-value approach. Loci with methylation level changes  
172 of > 5% between BPA and control groups and FDR < 0.05 for each tissue were considered statistically significant  
173 DMCs. To annotate the locations of the identified DMCs in relation to gene regions and repetitive DNA elements  
174 accessed from UCSC genome browser, we used the Bioconductor package “annotatr” [52]. Specifically, gene  
175 regions were categorized into 1) 1-5kb upstream of the transcription start site (TSS), 2) promoter (< 1kb upstream  
176 of the TSS), 3) 5' untranslated region (UTR), 4) exons, 5) introns, and 6) 3'UTR. The “annotatr” package was  
177 also used to annotate DMCs for known long non-coding RNAs (lncRNAs) based on GENCODE Release M16.  
178 Over-representation of DMCs within each category was calculated using Fisher's exact test. We further evaluated  
179 the link between DEGs and their local DMCs (DMCs annotated as any of the 6 above mentioned gene regions) by  
180 correlating the methylation ratio of DMCs with the expression level of DEGs.

181 **Pathway, network, and disease association analyses of DEGs and DMCs using the Mergeomics R**  
182 **package**

183 To investigate the functional connections among the BPA-associated DEGs or DMCs (collectively referred to as  
184 molecular signatures of BPAs) and to assess the potential association of BPA affected genes with diseases in  
185 human populations, we utilized the Mergeomics package [53], an open-source bioconductor package  
186 (<https://bioconductor.org/packages/devel/bioc/html/Mergeomics.html>) designed to perform various integrative  
187 analyses in multi-omics studies. Mergeomics consists of two main libraries, Marker Set Enrichment Analysis  
188 (MSEA) and Weighted Key Driver Analysis (wKDA). In the current study, we used MSEA to assess 1) whether  
189 known biological processes, pathways or transcription factor targets were enriched for BPA molecular signatures  
190 as a means to annotate the potential functions or regulators of the molecular signatures, and 2) whether the BPA  
191 signatures demonstrate enrichment for disease associations identified in human genome-wide association studies  
192 (GWAS) of various complex diseases (**S1 Fig**). wKDA leverages gene network topology (interactions or  
193 regulatory relations among genes) and edge weight (strength or reliability of interactions and regulatory relations)  
194 information of graphical gene networks to predict potential key regulators of a given group of genes, in this case,  
195 the BPA-associated DEGs (**S2 Fig**). Both MSEA and wKDA were built around a chi-square like statistics (**S1**  
196 **Text**) that yields robust findings that have been experimentally validated [41,42,53]. Details of each usage of the  
197 Mergeomics package are discussed below.

198 **Functional annotation of DEGs and DMCs**

199 To infer the functions of the DEGs and DMCs affected by BPA, we used MSEA to annotate the DEGs or local  
200 genes adjacent to the DMCs with known biological pathways curated from the Kyoto Encyclopedia of Genes and  
201 Genomes (KEGG) [54] and Reactome [55]. In brief, we extracted the differential expression p-values of genes in  
202 each pathway from the differential expression or methylation analyses and compared these p-values against the  
203 null distribution of p-values from random gene sets with matching gene numbers. If genes in a given pathway

204 collectively show more significant differential expression or differential methylation p-values compared to  
205 random genes based on a chi-square like statistic, we annotate the DEGs or DMCs using that pathway (**S1 Text**).  
206 DEGs and DMCs can have multiple over-represented pathways.

### 207 **Identification of transcription factor (TF) hotspots perturbed by BPA**

208 To dissect the regulatory cascades of BPA, we first assessed whether BPA-associated DEGs were downstream  
209 targets of specific transcription factors. The hypothesis behind this analysis is that BPA first affects TFs which in  
210 turn regulate the expression of downstream genes. We used TF regulatory networks for adipose, brain, and liver  
211 tissue retrieved from the FANTOM5 database [56]. Note that only a whole brain (instead of hypothalamus) TF  
212 network was available, which may only partially represent hypothalamic gene regulation. Each TF network was  
213 processed to keep the edges with high confidence (**S1 Text**). To identify TFs whose targets were perturbed by  
214 BPA, the downstream nodes of each TF in the network were pooled as the target genes for that TF. We then  
215 assessed the enrichment for BPA exposure related DEGs among the target genes of each TF using MSEA. TFs  
216 with  $FDR < 5\%$  were considered statistically significant. Cytoscape software was used for TF network  
217 visualization [57].

### 218 **Bayesian network and Weighted Key Driver Analysis (wKDA) to identify potential non-TF** 219 **regulators**

220 To further identify non-TF regulators that sense BPA and then perturb downstream genes, we used Bayesian  
221 networks (BN) of adipose, hypothalamus and liver tissues constructed from genetic and transcriptomic data from  
222 several large-scale mouse and human studies (**S1 Text and S1 Table**). wKDA was used to identify network key  
223 drivers (KDs), which are defined as network nodes whose neighboring subnetworks are significantly enriched for  
224 BPA-associated DEGs. Briefly, wKDA takes gene set  $G$  (i.e. BPA DEGs) and directional gene network  $N$  (i.e.  
225 BNs) as inputs. For every gene  $K$  in network  $N$ , neighboring genes within 1-edge distance were tested for

226 enrichment of genes in G using a chi-square like statistics followed by FDR assessment by permutation (**S1 Text**  
227 **and S2 Fig**). Network genes that reached  $FDR < 0.05$  were reported as potential KDs.

### 228 **Association of BPA DEGs and DMCs with mouse phenotypes and human diseases/traits**

229 To assess whether the BPA molecular signatures were related to phenotypes examined in the mouse offspring, we  
230 calculated the Pearson correlation coefficient among expression level of DEGs, methylation ratio of DMCs, and  
231 the measurement of metabolic traits. For human diseases or traits, we accessed the GWAS catalog database [58]  
232 and collected the lists of candidate genes reported to be associated with 161 human traits/diseases ( $P < 1e-5$ ).  
233 These genes were tested for enrichment of the BPA DEGs and DMCs in our mouse study using MSEA. We  
234 further curated all publicly available full summary statistics for 61 human traits/diseases from various public  
235 repositories (**S1 Text and S2 Table**). This allowed us to apply MSEA to comprehensively assess the enrichment  
236 for human disease association among BPA transcriptomic signatures using the full-spectrum of large-scale human  
237 GWAS. For each tissue-specific gene signature, we used the SNPs within a 50kb chromosomal distance as the  
238 representing SNPs for that gene. The trait/disease association p-values of the SNPs were then extracted from each  
239 GWAS and compared to the p-values of SNPs of random sets of genes to assess whether the BPA signatures were  
240 more likely to show stronger disease association in human GWAS (**S1 Text and S1 Fig**). This strategy has been  
241 successfully used in our previous animal model studies to assess the connection of genes affected by  
242 environmental perturbations such as diets and trauma to various human diseases [40,59].

243

## 244 **Results**

### 245 **Prenatal BPA exposure induces intrauterine growth retardation (IUGR) and alterations in** 246 **cardiometabolic phenotypes**

247 We exposed pregnant C57BL/6 mice to BPA during gestation (day 1 to day 20 post-conception) at the dosage of  
248 5mg/kg/day, and observed alterations in various metabolic phenotypes in the male and female offspring with  
249 prenatal BPA exposure at the weaning age. Compared with the control group, both male and female offspring  
250 from the BPA group showed significantly lower body weight, indicative of IUGR, a trait that is strongly  
251 associated with later life insulin resistance and obesity risk (**Fig 1B, D**). There were also significant decreases in  
252 serum lipid parameters and an increase in serum glucose level in males (**Fig 1C**), but not in females (**Fig 1E**). The  
253 decreases in the lipid parameters at this early developmental stage likely reflect the growth retardation phenotype  
254 observed and may provide feedback signals to predispose the exposed offspring to lipid dysregulation later in life.  
255 The phenotypic differences between BPA and control groups are not the results of litter effect, as offspring from  
256 different dams in each group showed similar patterns (**S3 Fig**).

257

### 258 **Prenatal BPA exposure induces tissue-specific transcriptomic alterations in male weaning** 259 **offspring**

260 To explore the molecular basis underlying the potential health impact of prenatal BPA exposure, we collected  
261 three core tissues important for metabolism from male offspring at 3 weeks. We focus on males due to the  
262 stronger phenotypes observed. Hypothalamus is the central regulator of endocrine and metabolic systems,  
263 whereas liver and white adipose tissues are critical for energy and metabolic homeostasis. We used RNA-seq to  
264 profile the transcriptome, and identified 86, 93, and 855 differentially expressed genes (DEGs) in the adipose  
265 tissue, hypothalamus, and liver tissue respectively, at  $FDR < 0.05$  (**Fig 2A, S3 Table**). This supports the ability of

266 prenatal BPA exposure to induce large-scale transcriptomic disruptions in offspring, with the impact appearing to  
267 be more prominent in liver. The DEGs were highly tissue-specific, with only 12 out of the 86 adipose DEGs and  
268 16 out of the 93 hypothalamus DEGs being found in liver. Interestingly, the hypothalamic DEGs are  
269 predominantly up-regulated in the BPA group whereas the other two tissues did not show such direction bias (**S4**  
270 **Table**). Only one gene, *Cyp51* (sterol 14-alpha demethylase), was shared across all three tissues but with different  
271 directional changes (upregulated in hypothalamus and liver, downregulated in adipose) (**Fig 2B**). The Cyp51  
272 protein catalyzes metabolic reactions including cholesterol and steroid biosynthesis and biological oxidation [60].  
273 Previously, this gene was also found to be critical regulator for testicular spermatogenesis [61]. The consistent  
274 alteration of *Cyp51* across tissues suggests that this gene is a general target of BPA, with the potential to alter  
275 functions related to cholesterol, hormone, and energy metabolism.

276

### 277 **Functional annotation of DEGs in adipose, hypothalamus, and liver tissues**

278 To better understand the biological implications of the BPA exposure related DEGs in individual tissues, we  
279 evaluated the enrichment of DEGs for known biological pathways and functional categories (**Fig 2C-E**, full  
280 results in **S5 Table**). We observed strong enrichment for pathways related to lipid metabolism (lipid transport,  
281 fatty acid metabolism, cholesterol biosynthesis) and energy metabolism (biological oxidation, TCA cycle) across  
282 all three tissues. Most of these pathways appeared to be upregulated in all three tissues, with the exception of  
283 downregulation of genes involved in biological oxidation in adipose tissue (**Fig 2C-E**). Individual tissues also  
284 showed perturbations of unique pathways: PPAR signaling and arachidonic acid pathways were altered in liver;  
285 extracellular matrix related processes were enriched among hypothalamic DEGs; core histone genes were  
286 upregulated in adipose DEGs (**Fig 2C-E**). In addition, triglyceride biosynthesis and glucose metabolism pathways  
287 were also moderately enriched among adipose DEGs, whereas few changes were seen for genes involved in  
288 adipocyte differentiation (**S4 Fig**).

289

290 **Prenatal BPA exposure induces tissue-specific epigenetic alterations in male weaning offspring**

291 Consistent with the observed gene expression disruptions at the transcriptomic level, we observed numerous  
292 methylomic alterations using RRBS, which characterizes DNA methylation states of millions of potential  
293 epigenetic sites at single base resolution. At FDR < 5%, 5136, 104, and 476 differentially methylated CpGs  
294 (DMCs) were found in adipose, hypothalamus, and liver tissues, respectively (**Fig 3A, S6 Table**). Interestingly,  
295 BPA induced local methylation changes in *Gm26917* and *Yam1*, two lncRNAs with no previously known link to  
296 BPA, consistently across three tissues (**Fig 3B**). The majority of the DMCs are located in intergenic regions (32%  
297 - 38%), followed by introns (31% - 37%) and exons (13% - 15%), but there is a paucity of DMCs in the promoter  
298 region (3% - 5%) (**S5 Fig**). Contrary to predictions that promoter regions may be more prone to epigenetic  
299 changes, we found that within-gene and intergenic methylation alterations in DNA methylation are more  
300 prevalent, a pattern consistently observed in previous epigenomic studies [40,62]. In addition, 5.0%, 8.6%, and  
301 8.1% DMCs overlap with repetitive DNA elements in adipose, hypothalamus, and liver, respectively,  
302 recapitulating previous report of the interaction between BPA and repetitive DNA [63].

303 For DMCs that are located within or adjacent to genes, we further tested whether the local genes adjacent to those  
304 DMCs show enrichment for known functional categories. Unlike DEGs, top processes enriched for DMCs  
305 concentrated on intra- and extra-cellular communication and signaling related pathways such as axon guidance,  
306 extracellular matrix organization and NGF signaling (**Fig 3C, full results in S7 Table**). The affected genes in  
307 these processes are related to cellular structure, cell adhesion, and cell migration, indicating that these functions  
308 may be particularly vulnerable to BPA induced epigenetic modulation.

309

## 310 **Potential regulatory role of DMCs in transcriptional regulation of BPA induced DEGs**

311 To explore the role of DMCs in regulating DEGs, we evaluated the connection between transcriptome and  
312 methylome by correlating the expression level of DEGs with the methylation ratio of their local DMCs. For the  
313 DEGs in adipose, hypothalamus and liver tissue, we identified 42, 36, and 278 local DMCs whose methylation  
314 ratios were significantly correlated with the gene expression. At a global level, compared to non-DEGs, DEGs are  
315 more likely to contain local correlated DMCs (**S6 Fig**). A closer look into the expression-methylation correlation  
316 by different chromosomal regions further revealed a context dependent correlation pattern (**Fig 3D**). In adipose  
317 and liver, the 3-5% of DMCs in promoter regions tend to show significant enrichment for negative correlation  
318 with DEGs, whereas gene body methylations for DEGs are more likely to show significant enrichment for  
319 positive correlation with gene expression. In hypothalamus, however, positive correlations between DEGs and  
320 DMCs are more prevalent across different gene regions. In addition, liver DMCs within lncRNAs were uniquely  
321 enriched for negative correlation with lncRNA expression, although the lack of a reliable mouse lncRNA target  
322 database prevented us from further investigating whether downstream targets of the lncRNAs were enriched in the  
323 DEGs. Specific examples of DEGs showing significant correlation with local DMCs include adipose DEG  
324 *Slc25a1* (Solute Carrier Family 25 Member 1, involved in triglyceride biosynthesis), hypothalamic DEG *Mvk*  
325 (Mevalonate Kinase, involved in cholesterol biosynthesis), and liver DEG *Gm20319* (a lncRNA with unknown  
326 function) (**S7 Fig and S8 Table**). These results support a role of BPA-induced differential methylation in altering  
327 the expression levels of adjacent genes.

328

## 329 **Pervasive influence of prenatal BPA exposure on the liver transcription factor network**

330 BPA is known to bind to diverse types of nuclear receptors such as estrogen receptors and peroxisome  
331 proliferator-activated (PPAR) receptors that function as transcription factors (TFs), thus influencing the action of  
332 downstream genes [64,65]. *PPARg* in particular has been shown to be a target of BPA in mouse and human and



333 mechanistically linking BPA exposure with its associated effect on weight gain and increased adipogenesis [66-  
334 68]. To explore the TF regulatory landscape underlying BPA exposure based on our genome-wide data, we  
335 leveraged tissue-specific TF regulatory networks from the FANTOM5 project [56] and integrated it with our BPA  
336 transcriptome profiling data. No TF was found to be differentially expressed in adipose tissue, whereas 1 TF  
337 (Pou3f1) and 14 TFs (such as Esrra, Hnf1a, Pparg, Tcf21, Srebf1) were found to be differentially expressed in  
338 hypothalamus and liver, respectively. Due to the temporal nature of TF action, changes in TF levels may precede  
339 the downstream target genes and not be reflected in the transcriptomic profiles measured at the time of sacrifice.  
340 Therefore, we further curated the target genes of TFs from FANTOM5 networks and tested the enrichment for the  
341 target genes of each TF among our tissue-specific DEGs (**S9 Table**). This analysis confirmed that BPA perturbs  
342 the activity of the downstream targets for estrogen receptors Esrrg ( $p = 1.4e-3$ , FDR = 1.9%) and Esrra ( $p = 0.03$ ,  
343 FDR = 13%) in liver, as well as Esr1 in both adipose ( $p = 7.2e-3$ , FDR = 10.6%) and liver ( $p = 7.2e-3$ , FDR =  
344 4.7%). Targets of Pparg were also perturbed in liver ( $p = 4.1e-3$ , FDR = 3.8%). Therefore, we demonstrated that  
345 our data-driven network modeling is able to not only recapitulate results from previous *in-vitro* and *in-vivo* studies  
346 showing that BPA influences estrogen signaling and PPAR signaling [65], but also uniquely point to the tissue  
347 specificity of these BPA target TFs.

348 In addition to these expected TFs, we identified 14 adipose TFs and 61 liver TFs whose target genes were  
349 significantly enriched for BPA DEGs at FDR < 5%. Many of these TFs showed much stronger enrichment for  
350 BPA DEGs among their downstream targets than the estrogen receptors (**S9 Table**). The adipose TFs include  
351 nuclear transcription factor Y subunit alpha (Nfya) and fatty acid synthase (Fasn), both implicated in the  
352 adipocyte energy metabolism [69]. The liver TFs include multiple genes from the hepatocyte nuclear factors  
353 (HNF) family and the CCAAT-enhancer-binding proteins (CEBP) family, which are critical for liver development  
354 and function, suggesting a pervasive influence of BPA on liver TF regulation.

355 We further extracted the subnetwork containing 89 unique downstream targets of the significant liver TFs that are  
356 also liver DEGs. This subnetwork showed significant enrichment for genes involved in metabolic pathways such

357 as steroid hormone biosynthesis and fatty acid metabolism. The regulatory subnetwork for the top liver TFs (FDR  
358 < 5%) revealed a highly interconnected TF subnetwork that potentially senses BPA exposure and in turn governs  
359 the expression levels of their targets (**Fig 4A**), with *Pparg* and *Hnf4* among the core TFs. Some of the TFs in this  
360 network, including *Esr1*, *Esrrg*, *Foxp1*, and *Tcf7l1*, also had local DMCs identified in our study, indicating that  
361 BPA may perturb this liver TF subnetwork via local modification of DNA methylation of key TFs.

362

### 363 **Identification of potential non-TF regulators governing BPA induced molecular perturbations**

364 To further identify regulatory genes that mediate the action of BPA on downstream targets through non-TF  
365 mechanisms, we leveraged data-driven tissue-specific Bayesian networks (BNs) generated from multiple  
366 independent human and mouse studies (**S1 Table**). These data-driven networks are complementary to the TF  
367 networks used above and have proven valuable for accurately predicting gene-gene regulatory relationships and  
368 novel key drivers (KDs) [39-42,70]. KDs were defined as network nodes whose surrounding subnetworks are  
369 significantly enriched for BPA exposure related DEGs. At FDR < 1%, we identified 21, 1, and 100 KDs in  
370 adipose, hypothalamus, and liver, respectively (**S10 Table**). The top KDs in adipose (top 5 KDs *Acss2*, *Pc*,  
371 *Agpat2*, *Slc25a1*, *Acly*), hypothalamus (*Fa2h*) and liver (top 5 KDs *Dhcr7*, *Aldh3a2*, *Fdft1*, *Mtmr11*, *Hmgcr*) were  
372 involved in cholesterol, fatty acid and glucose metabolism processes. In addition, three KDs, *Acss2* (Acetyl-  
373 Coenzyme A Synthetase 2), *Acat2* (Acetyl-CoA Acetyltransferase 2), and *Fasn* (Fatty Acid Synthase), were  
374 involved in the upregulation of DEGs in both adipose and liver, despite the fact that few DEG signatures overlap  
375 across tissues (**Fig 4B**). These KDs are consistent with the observed increased expression of several genes  
376 implicated in lipogenesis, including *Fasn*, and help explain the liver accumulation of triglycerides when mice are  
377 exposed to BPA [71]. Together, these results indicate that BPA may engage certain common regulators which  
378 have tissue-specific targets. The distinct upregulatory pattern within the subnetworks of individual KDs supports  
379 the potential functional importance of KDs in orchestrating the action of downstream genes. These KDs, along

380 with the newly identified TFs from the above analysis, may represent novel regulatory targets which transmit the  
381 *in vivo* biological effects of BPA.

382

### 383 **BPA transcriptomic and methylomic signatures are related to metabolic traits in mice**

384 To assess the relationship between the BPA molecular signatures and metabolic traits in the mouse model, the  
385 DEGs and DMCs from individual tissues were tested for correlation with the measured metabolic traits: body  
386 weight, free fatty acids, total cholesterol, high density lipoprotein cholesterol, triglycerides and blood glucose. At  
387  $p < 0.05$ , over two thirds of tissue-specific DEGs and over 60% DMCs were identified to be correlated with at  
388 least one metabolic trait (**Fig 5A, B**). Notably, liver DEGs exhibited stronger correlation with free fatty acid and  
389 triglycerides, whereas adipose DEGs were uniquely associated with glucose level, which is consistent with the  
390 pathway annotation results for these tissues. On the other hand, liver DMCs showed stronger correlations with  
391 metabolic traits than those from adipose and hypothalamus tissues.

392 Cross-examination of correlation across gene expression, DNA methylation, and metabolic traits revealed 35  
393 consistent DEG-DMC-trait associations (3 in adipose, 4 in hypothalamus, and 28 in liver) (**S11 Table**). For  
394 example, in adipose tissue, *Fasn* (also a perturbed TF hotspot in adipose, and a shared KD in adipose and liver)  
395 was correlated with its exonic DMC at chr11:120816457, and both were correlated with triglyceride level; in  
396 hypothalamus, *Igflr* (Insulin Like Growth Factor 1 Receptor) was correlated with its intronic DMC at  
397 chr7:68072768, and both were correlated with blood glucose level; in liver, *Adh1* (Alcohol Dehydrogenase 1A)  
398 was correlated with its intronic DMC at chr3:138287690, and both were correlated with body weight (**Fig 5C**).

399 These results suggest that BPA alters local DMCs of certain genes to regulate gene expression, which may in turn  
400 regulate distinct metabolic traits.

401

## 402 **Relevance of BPA signature to human complex traits/diseases**

403 Human observational studies have associated developmental BPA exposure with a wide variety of human  
404 diseases ranging from cardiometabolic diseases to neuropsychiatric disorders [14,15,72]. Large-scale human  
405 genome-wide association studies offer an unbiased view of the genetic architecture for various human  
406 traits/diseases, and intersections of the molecular footprints of BPA in our mouse study with human disease risk  
407 genes can help infer the potential disease-causing properties of BPA in humans. From the GWAS Catalog [58],  
408 we collected associated genes for 161 human traits/diseases (traits with fewer than 50 associated genes were  
409 excluded), and evaluated the enrichment for the trait associated genes among DEG and DMC signatures. At FDR  
410  $< 5\%$ , no trait was found to be significantly enriched for BPA DEGs. Surprisingly, despite the difference between  
411 tissue-specific DMCs (**Fig 3B**), 19 out the 161 traits showed consistently strong enrichment for DMCs across all  
412 three tissues at FDR  $< 1\%$ . The top traits include body mass index (BMI) and type 2 diabetes (**Table 1**). As DNA  
413 methylation status is known to determine long-term gene expression pattern instead of immediate dynamic gene  
414 regulation, the BMI and diabetes associated genes may be under long-term programming by BPA-induced  
415 differential methylation, thereby affecting later disease risks.

416 The above analysis involving the GWAS catalog focused only on small sets of the top candidate genes for various  
417 diseases and may have limited statistical power. To improve the statistical power, we curated the full summary  
418 statistics from 61 human GWAS that are publicly available (covering millions of SNP-trait associations in each  
419 GWAS), which enabled us to extend the assessment of disease association by considering additional human  
420 disease genes with moderate to low effect sizes (**Methods**). This analysis showed that DEGs from all three tissues  
421 exhibited consistent enrichment for genes associated with lipid traits such as triglycerides, LDL, and HDL (**Fig**  
422 **6A-C**). Interestingly, enrichment for birth weight and birth length was also observed for hypothalamus and liver  
423 signatures, respectively. Liver DEGs were also significantly associated with coronary artery disease,  
424 inflammatory bowel disease, Alzheimer's disease, and schizophrenia. Top DEGs driving the inflammatory bowel  
425 disease association involve immune and inflammatory response genes (*PSMB9*, *TAP1*, *TNF*), whereas association

426 with Alzheimer's disease and schizophrenia involve genes related to cholesterol homeostasis (*APOA4*, *ABCG8*,  
427 *SOAT2*) and mitochondrial function (*GCDH*, *PDPR*, *SHMT2*), respectively. These results suggest that tissue-  
428 specific targets of BPA are connected to diverse human complex diseases through both the central nervous system  
429 and peripheral tissues.

430

## 431 **Discussion**

432 This multi-tissue, multi-omics integrative study represents one of the first systems biology investigations of  
433 prenatal BPA exposure. By integrating systematic profiling of the transcriptome and methylome of multiple  
434 metabolic tissues with phenotypic trait measurements, large-scale human association datasets, and network  
435 analysis, we uncovered insights into the molecular regulatory mechanisms underlying the health effect of prenatal  
436 BPA exposure. Specifically, we identified tens to hundreds of tissue-specific DEGs and DMCs involved in  
437 diverse biological functions such as metabolic pathways (oxidative phosphorylation/TCA cycle, fatty acid,  
438 cholesterol, glucose metabolism, and PPAR signaling), extracellular matrix, focal adhesion, and inflammation  
439 (arachidonic acid), with DMCs partially explaining the regulation of DEGs. Network analysis helped reveal  
440 potential regulatory circuits post BPA exposure and pinpointed both tissue-specific and cross-tissue regulators of  
441 BPA activities, including TFs such as estrogen receptors, *PPARg*, and *HNF1A*, and non-TF key drivers such as  
442 *FASN*. Furthermore, the BPA gene signatures and the predicted regulators were found to be linked to a wide  
443 spectrum of disease-related traits in both mouse and human.

444 The large-scale disruption we observed in the transcriptome and methylome in adipose and liver was consistent  
445 with previous reports [32,35,73,74]. For instance, comparison of our liver DEGs with the liver signatures  
446 identified from meta-analysis of available GEO datasets showed significant overlap ( $P = 8.2e-3$  by Fisher's exact  
447 test, **See S1 Text**). However, our unique study design of examining multi-omics in multiple tissues in parallel  
448 yields higher comparability when integrating the results between data types and across tissues, as they were from

449 the same set of animals and were profiled in the same conditions. Furthermore, our advanced multidimensional  
450 integrative approach provides deeper insights into the regulatory cascades within and across tissues. Across all  
451 three tissues at the transcriptome level, we found that lipid metabolism and energy homeostasis related processes  
452 were consistently perturbed, with the scale of perturbation being strongest in liver. This aligns well with the  
453 significant changes in the plasma lipid profiles we observed in the offspring, the reported perturbation of lipid  
454 metabolism in fetal murine liver [74], and the reported susceptibility for nonalcoholic fatty liver diseases  
455 following BPA exposure [75-77]. The only shared gene across tissues, *Cyp51*, is involved in cholesterol and sterol  
456 biosynthesis and beta oxidation, again supporting that metabolism is a central target of BPA. At the methylome  
457 level, we are able to replicate 5 out of 7 peak hypomethylated genes, and 6 out of 9 peak hypermethylated genes  
458 from a study focusing on the gonadal adipose tissue [35]. We also revealed an intriguing link between BPA and  
459 lncRNAs across tissues, whose functional importance in developmental processes, disease progression, and  
460 response to BPA exposure was increasingly recognized yet underexplored [78]. Our molecular data provides  
461 intriguing lncRNA candidates such as *Gm20319*, *Gm26917*, and *Yam1* for future in-depth functional analyses.

462 For adipose tissue, clusters of genes responsible for core histones were found to be uniquely altered. Along with  
463 the strong adipose-specific differential methylation status, our results revealed gonadal adipose tissues as an  
464 especially vulnerable site for BPA induced epigenetic reprogramming. Besides, developmental BPA exposure has  
465 been previously suggested to influence white adipocyte differentiation [79-81]. However, the adipocyte  
466 differentiation pathway was not significantly enriched in our study. This is consistent with the report by Angel et  
467 al. [81], where increased adipocyte number is only found in mouse offspring with prenatal BPA exposure at  
468 5ug/kg/day and 500ug/kg/day, but not 5mg/kg/day. Additionally, we found significant changes in triglyceride  
469 biosynthesis and glucose metabolism genes, suggesting that prenatal BPA exposure affects fat storage and glucose  
470 homeostasis in the adipose tissue. Although here we mainly investigate gonadal adipose tissue as a surrogate for  
471 abdominal fat in the context of metabolic disorders, the information may be useful for exploring the relationship  
472 between this fat depot and the gonad.

473 With regards to the hypothalamus, our study is the first to investigate the effect of BPA on the hypothalamic  
474 transcriptome and DNA methylome. Hypothalamus is an essential brain region that regulates the endocrine  
475 system, peripheral metabolism, and numerous brain functions. We identified BPA-induced DEGs and DMCs that  
476 were enriched for extracellular matrix related processes such as axon guidance, focal adhesion, and various  
477 metabolic processes. These hypothalamic pathways have been previously associated with metabolic [40,41] and  
478 neurodegenerative diseases [40,82], and they could underlie the reported disruption of hypothalamic melanocortin  
479 circuitry after BPA exposure [83]. Our study highlights the hypothalamus as another critical yet under-recognized  
480 target for BPA.

481 By interrogating both the transcriptome and DNA methylome in matching tissues, we were able to directly assess  
482 both global and specific correlative relationships between DEGs and DMCs (**S6 Fig, Fig 3D**). Specifically, we  
483 found that DEGs are more likely to have correlated DMCs in the matching tissue, a trend that persists in non-  
484 promoter regions. Our results corroborate previous findings regarding the importance of gene body methylation in  
485 disease etiology [84,85]. Given that over 90% of DMCs were found in non-promoter regions, closer investigation  
486 of the regulatory circuits involving these regions may unveil new insights into BPA response [62].

487 Known as an endocrine disrupting chemical, BPA has been speculated to exert its primary biological action by  
488 modifying the activity of hormone receptors, including estrogen receptors, PPAR $\gamma$  and glucocorticoid receptors  
489 [65]. Indeed, the activity for the downstream targets of Pparg and three estrogen and estrogen-related receptors  
490 were found to be disrupted in liver by prenatal BPA exposure. More importantly, our unbiased data-driven  
491 analysis revealed many novel transcription factors and non-TF regulatory genes that also likely mediate BPA  
492 effects. In fact, many of the newly identified TF targets of BPA, such as Fasn and several hepatic nuclear factors,  
493 showed much higher ranking in our regulator prediction analyses. In liver, a tightly inter-connected TF  
494 subnetwork was highly concentrated with BPA affected genes involved in metabolic processes such as  
495 cytochrome P450 system (*Cyp3a25*, *Cyp2a12*, *Cyp1a2*), lipid (*Apoa4*, *Abcg5*, *Soat2*) and glucose (*Hnf1a*,  
496 *Adra1b*, *Gck*) regulation, with extensive footprints of altered methylation status in the TFs and other subnetwork

497 genes (**Fig 4A**). Therefore, our results support a widespread impact of BPA on liver transcriptional regulation, and  
498 the convergence of differential methylation and gene expression in this TF subnetwork implies that BPA perturbs  
499 this subnetwork via epigenetic regulation of the TFs, which in turn trigger transcriptomic alterations in  
500 downstream genes. In adipose, we discovered a regulatory axis governed by *Nfya* and *Fasn* that are known  
501 regulators of fatty acid metabolism and adipogenesis. NF-YA is a histone-fold domain protein that binds to the  
502 inverted CCAAT element in the *Fasn* promoter [69,86], and both *Nfya* and *Fasn* were found to significantly  
503 perturbed by BPA in our study. Moreover, *Fasn* also serves as a cross-tissue KD, governing distinct groups of up-  
504 regulated lipid metabolism genes in adipose and liver post-BPA exposure (**Fig 4B**), supporting its role in  
505 mediating the BPA-induced lipid dysregulation at the systemic level. The significant correlation of gene  
506 expression and methylation for *Fasn* with triglyceride level furthers implicates its role as a network-level  
507 regulator and biomarker for BPA induced lipid dysregulation. Our observation of *Fasn* is consistent with  
508 evidences suggesting its susceptibility to methylation perturbation under obesogenic feeding [87] and its causal  
509 functional importance for fatty liver diseases [42,88]. These novel regulators warrant future experimental testing  
510 of their causal regulatory role in BPA activities via genetic manipulation studies, such as knocking down or  
511 overexpressing *Fasn* to examine the modulation of BPA activities.

512 One unique aspect of this study is the linking of the molecular landscape of prenatal BPA exposure to  
513 traits/diseases in both mouse and human. In our mouse study, the observed changes in body weight, lipid profiles,  
514 and glucose level are highly concordant with the functions of the molecular targets. For instance, prenatal BPA  
515 exposure perturbs both the expression levels and the local DNA methylation status of *Fasn*, *Igf1r*, and *Adh1*.  
516 These DEGs and their local DMCs also significantly correlate with phenotypic outcomes, thus serving as  
517 examples of how DNA methylation and gene regulation bridge the gap between BPA exposure and phenotypic  
518 manifestation. To further enhance the translatability of our findings from mouse to human, we searched for  
519 human diseases linked to the BPA-affected genes. An intriguing discovery is the prominent overrepresentation of  
520 differential methylation signals in adipose, hypothalamus, and liver within known genes related to obesity and



521 type 2 diabetes, supporting that BPA may impact obesity and diabetes risk through systemic reprogramming of  
522 DNA methylation. More sophisticated analysis incorporating the BPA differential gene expression and the full  
523 statistics of human genome-wide association studies corroborated the observed connection between prenatal BPA  
524 exposure and lipid homeostasis [89], birth weight [90], and coronary artery disease [14] reported in observational  
525 studies. Moreover, our findings suggest the involvement of prenatal BPA exposure in the development of  
526 inflammatory bowel syndrome, schizophrenia, and Alzheimer's disease. These associations warrant future  
527 investigations.

528 One limitation of our work is the restriction of study scope to weaning age male mice with *in utero* BPA exposure  
529 below the NOAEL (5mg/kg/d) as a proof-of-concept for our systems biology framework. Considering that the  
530 effects of early-life exposure to BPA is highly variable and dependent on factors such as the dose, window, route,  
531 and frequency of exposure as well as genetic background, age, and sex [13], future studies testing these additional  
532 variables are necessary to generate a comprehensive understandings of BPA risks under various exposure  
533 conditions.

## 534 **Conclusions**

535 Our study represents the first multi-tissue, multi-omics integrative investigation of prenatal BPA exposure. The  
536 systems biology framework we applied revealed how BPA triggers cascades of regulatory circuits involving  
537 numerous transcription factors and non-TF regulators that coordinate diverse molecular processes within and  
538 across core metabolic tissues, thereby highlighting that BPA exerts its biological functions via much more diverse  
539 targets than previously thought. As such, our findings offer a comprehensive systems-level understanding of  
540 tissue sensitivity and molecular perturbations elicited by prenatal BPA exposure, and offer promising novel  
541 candidates for targeted mechanistic investigation as well as much-needed network-level biomarkers of prior BPA  
542 exposure. The strong influence of BPA on metabolic pathways and cardiometabolic phenotypes merits its  
543 characterization as a general metabolic disruptor posing systemic health risks.

544

545 **Acknowledgments**

546 LS is supported by UCLA Dissertation Year Fellowship, Eureka Scholarship, Hyde Scholarship, Burroughs  
547 Wellcome Fund Inter-School Program in Metabolic Diseases Fellowship, and China Scholarship Council. XY is  
548 supported by NIH DK104363 and NS103088, and Leducq Foundation. We would also like to thank Zhe Ying's  
549 assistance in collecting mice hypothalamus tissue, and Dr. Guanglin Zhang's assistance in the RRBS experiments.

550 **Competing interests**

551 The authors declare that they have no competing interest.

552 **References**

- 553 1. Barouki R, Gluckman PD, Grandjean P, Hanson M, Heindel JJ (2012) Developmental origins of non-  
554 communicable disease: implications for research and public health. *Environ Health* 11: 42.
- 555 2. Boekelheide K, Blumberg B, Chapin RE, Cote I, Graziano JH, et al. (2012) Predicting later-life outcomes of  
556 early-life exposures. *Environ Health Perspect* 120: 1353-1361.
- 557 3. Heindel JJ, Vandenberg LN (2015) Developmental origins of health and disease: a paradigm for understanding  
558 disease etiology and prevention. *Current opinion in pediatrics* 27: 248.
- 559 4. Vandenberg LN, Hauser R, Marcus M, Olea N, Welshons WV (2007) Human exposure to bisphenol A (BPA).  
560 *Reprod Toxicol* 24: 139-177.
- 561 5. Tsai WT (2006) Human health risk on environmental exposure to Bisphenol-A: a review. *J Environ Sci Health*  
562 *C Environ Carcinog Ecotoxicol Rev* 24: 225-255.
- 563 6. Sun C, Leong LP, Barlow PJ, Chan SH, Bloodworth BC (2006) Single laboratory validation of a method for  
564 the determination of Bisphenol A, Bisphenol A diglycidyl ether and its derivatives in canned foods by reversed-  
565 phase liquid chromatography. *J Chromatogr A* 1129: 145-148.
- 566 7. Calafat AM, Ye X, Wong LY, Reidy JA, Needham LL (2008) Exposure of the U.S. population to bisphenol A  
567 and 4-tertiary-octylphenol: 2003-2004. *Environ Health Perspect* 116: 39-44.
- 568 8. Rubin BS, Paranjpe M, DaFonte T, Schaeberle C, Soto AM, et al. (2017) Perinatal BPA exposure alters body  
569 weight and composition in a dose specific and sex specific manner: The addition of peripubertal exposure  
570 exacerbates adverse effects in female mice. *Reprod Toxicol* 68: 130-144.
- 571 9. Hao M, Ding L, Xuan L, Wang T, Li M, et al. (2017) Urinary bisphenol A concentration and the risk of central  
572 obesity in Chinese adults: A prospective study. *J Diabetes*.
- 573 10. Beydoun HA, Khanal S, Zonderman AB, Beydoun MA (2014) Sex differences in the association of urinary  
574 bisphenol-A concentration with selected indices of glucose homeostasis among U.S. adults. *Ann Epidemiol* 24:  
575 90-97.

- 576 11. Teppala S, Madhavan S, Shankar A (2012) Bisphenol A and Metabolic Syndrome: Results from NHANES.  
577 Int J Endocrinol 2012: 598180.
- 578 12. Mouneimne Y, Nasrallah M, Khoueiry-Zgheib N, Nasreddine L, Nakhoul N, et al. (2017) Bisphenol A urinary  
579 level, its correlates, and association with cardiometabolic risks in Lebanese urban adults. Environ Monit Assess  
580 189: 517.
- 581 13. Wassenaar PNH, Trasande L, Legler J (2017) Systematic Review and Meta-Analysis of Early-Life Exposure  
582 to Bisphenol A and Obesity-Related Outcomes in Rodents. Environ Health Perspect 125: 106001.
- 583 14. Han C, Hong YC (2016) Bisphenol A, Hypertension, and Cardiovascular Diseases: Epidemiological,  
584 Laboratory, and Clinical Trial Evidence. Curr Hypertens Rep 18: 11.
- 585 15. Ranciere F, Lyons JG, Loh VH, Botton J, Galloway T, et al. (2015) Bisphenol A and the risk of  
586 cardiometabolic disorders: a systematic review with meta-analysis of the epidemiological evidence. Environ  
587 Health 14: 46.
- 588 16. Liu J, Yu P, Qian W, Li Y, Zhao J, et al. (2013) Perinatal bisphenol A exposure and adult glucose  
589 homeostasis: identifying critical windows of exposure. PLoS One 8: e64143.
- 590 17. Ryan KK, Haller AM, Sorrell JE, Woods SC, Jandacek RJ, et al. (2010) Perinatal exposure to bisphenol-a and  
591 the development of metabolic syndrome in CD-1 mice. Endocrinology 151: 2603-2612.
- 592 18. Miyawaki J, Sakayama K, Kato H, Yamamoto H, Masuno H (2007) Perinatal and postnatal exposure to  
593 bisphenol a increases adipose tissue mass and serum cholesterol level in mice. J Atheroscler Thromb 14: 245-252.
- 594 19. Rubin BS, Soto AM (2009) Bisphenol A: Perinatal exposure and body weight. Mol Cell Endocrinol 304: 55-  
595 62.
- 596 20. Garcia-Arevalo M, Alonso-Magdalena P, Rebelo Dos Santos J, Quesada I, Carneiro EM, et al. (2014)  
597 Exposure to bisphenol-A during pregnancy partially mimics the effects of a high-fat diet altering glucose  
598 homeostasis and gene expression in adult male mice. PLoS One 9: e100214.

- 599 21. Manikkam M, Tracey R, Guerrero-Bosagna C, Skinner MK (2013) Plastics derived endocrine disruptors  
600 (BPA, DEHP and DBP) induce epigenetic transgenerational inheritance of obesity, reproductive disease and  
601 sperm epimutations. PLoS One 8: e55387.
- 602 22. Susiarjo M, Xin F, Bansal A, Stefaniak M, Li C, et al. (2015) Bisphenol a exposure disrupts metabolic health  
603 across multiple generations in the mouse. Endocrinology 156: 2049-2058.
- 604 23. Bansal A, Rashid C, Xin F, Li C, Polyak E, et al. (2017) Sex- and Dose-Specific Effects of Maternal  
605 Bisphenol A Exposure on Pancreatic Islets of First- and Second-Generation Adult Mice Offspring. Environ  
606 Health Perspect 125: 097022.
- 607 24. Baillie-Hamilton PF (2002) Chemical toxins: a hypothesis to explain the global obesity epidemic. J Altern  
608 Complement Med 8: 185-192.
- 609 25. Heindel JJ (2003) Endocrine disruptors and the obesity epidemic. Toxicol Sci 76: 247-249.
- 610 26. Newbold RR, Padilla-Banks E, Jefferson WN, Heindel JJ (2008) Effects of endocrine disruptors on obesity.  
611 Int J Androl 31: 201-208.
- 612 27. EFS Authority (2015) Scientific opinion on the risks to public health related to the presence of bisphenol A  
613 (BPA) in foodstuffs. EFSA Journal 13.
- 614 28. Beronius A, Johansson N, Ruden C, Hanberg A (2013) The influence of study design and sex-differences on  
615 results from developmental neurotoxicity studies of bisphenol A: implications for toxicity testing. Toxicology  
616 311: 13-26.
- 617 29. Ariemma F, D'Esposito V, Liguoro D, Oriente F, Cabaro S, et al. (2016) Low-Dose Bisphenol-A Impairs  
618 Adipogenesis and Generates Dysfunctional 3T3-L1 Adipocytes. PLoS One 11: e0150762.
- 619 30. Ben-Jonathan N, Hugo ER, Brandebourg TD (2009) Effects of bisphenol A on adipokine release from human  
620 adipose tissue: Implications for the metabolic syndrome. Mol Cell Endocrinol 304: 49-54.
- 621 31. Olsvik PA, Skjaerven KH, Softeland L (2017) Metabolic signatures of bisphenol A and genistein in Atlantic  
622 salmon liver cells. Chemosphere 189: 730-743.

623 32. Lejonklou MH, Dunder L, Bladin E, Pettersson V, Ronn M, et al. (2017) Effects of Low-Dose Developmental  
624 Bisphenol A Exposure on Metabolic Parameters and Gene Expression in Male and Female Fischer 344 Rat  
625 Offspring. *Environ Health Perspect* 125: 067018.

626 33. Anderson OS, Kim JH, Peterson KE, Sanchez BN, Sant KE, et al. (2017) Novel Epigenetic Biomarkers  
627 Mediating Bisphenol A Exposure and Metabolic Phenotypes in Female Mice. *Endocrinology* 158: 31-40.

628 34. Ma Y, Xia W, Wang DQ, Wan YJ, Xu B, et al. (2013) Hepatic DNA methylation modifications in early  
629 development of rats resulting from perinatal BPA exposure contribute to insulin resistance in adulthood.  
630 *Diabetologia* 56: 2059-2067.

631 35. Taylor JA, Shioda K, Mitsunaga S, Yawata S, Angle BM, et al. (2017) Prenatal Exposure to Bisphenol A  
632 Disrupts Naturally Occurring Bimodal DNA Methylation at Proximal Promoter of *fggy*, an Obesity-relevant Gene  
633 Encoding a Carbohydrate Kinase, in Gonadal White Adipose Tissues of CD-1 Mice. *Endocrinology*.

634 36. Faulk C, Kim JH, Jones TR, McEachin RC, Nahar MS, et al. (2015) Bisphenol A-associated alterations in  
635 genome-wide DNA methylation and gene expression patterns reveal sequence-dependent and non-monotonic  
636 effects in human fetal liver. *Environ Epigenet* 1.

637 37. Nahar MS, Kim JH, Sartor MA, Dolinoy DC (2014) Bisphenol A-associated alterations in the expression and  
638 epigenetic regulation of genes encoding xenobiotic metabolizing enzymes in human fetal liver. *Environ Mol*  
639 *Mutagen* 55: 184-195.

640 38. Messerlian C, Martinez RM, Hauser R, Baccarelli AA (2017) 'Omics' and endocrine-disrupting chemicals—  
641 new paths forward. *Nature Reviews Endocrinology* 13: 740.

642 39. Makinen VP, Civelek M, Meng Q, Zhang B, Zhu J, et al. (2014) Integrative genomics reveals novel molecular  
643 pathways and gene networks for coronary artery disease. *PLoS Genet* 10: e1004502.

644 40. Meng Q, Ying Z, Noble E, Zhao Y, Agrawal R, et al. (2016) Systems Nutrigenomics Reveals Brain Gene  
645 Networks Linking Metabolic and Brain Disorders. *EBioMedicine* 7: 157-166.

- 646 41. Shu L, Chan KHK, Zhang G, Huan T, Kurt Z, et al. (2017) Shared genetic regulatory networks for  
647 cardiovascular disease and type 2 diabetes in multiple populations of diverse ethnicities in the United States.  
648 PLoS Genet 13: e1007040.
- 649 42. Krishnan KC, Kurt Z, Barrere-Cain R, Sabir S, Das A, et al. (2018) Integration of Multi-omics Data from  
650 Mouse Diversity Panel Highlights Mitochondrial Dysfunction in Non-alcoholic Fatty Liver Disease. Cell  
651 Systems.
- 652 43. Dolinoy DC, Huang D, Jirtle RL (2007) Maternal nutrient supplementation counteracts bisphenol A-induced  
653 DNA hypomethylation in early development. Proc Natl Acad Sci U S A 104: 13056-13061.
- 654 44. Susiarjo M, Sasson I, Mesaros C, Bartolomei MS (2013) Bisphenol a exposure disrupts genomic imprinting in  
655 the mouse. PLoS Genet 9: e1003401.
- 656 45. Bromer JG, Zhou Y, Taylor MB, Doherty L, Taylor HS (2010) Bisphenol-A exposure in utero leads to  
657 epigenetic alterations in the developmental programming of uterine estrogen response. FASEB J 24: 2273-2280.
- 658 46. Andrews S (2010) FastQC: a quality control tool for high throughput sequence data.
- 659 47. Pertea M, Kim D, Pertea GM, Leek JT, Salzberg SL (2016) Transcript-level expression analysis of RNA-seq  
660 experiments with HISAT, StringTie and Ballgown. Nat Protoc 11: 1650-1667.
- 661 48. Love MI, Huber W, Anders S (2014) Moderated estimation of fold change and dispersion for RNA-seq data  
662 with DESeq2. Genome Biol 15: 550.
- 663 49. Storey JD, Tibshirani R (2003) Statistical significance for genomewide studies. Proc Natl Acad Sci U S A  
664 100: 9440-9445.
- 665 50. Xi Y, Li W (2009) BSMAP: whole genome bisulfite sequence MAPping program. BMC Bioinformatics 10:  
666 232.
- 667 51. Sun D, Xi Y, Rodriguez B, Park HJ, Tong P, et al. (2014) MOABS: model based analysis of bisulfite  
668 sequencing data. Genome Biol 15: R38.
- 669 52. Cavalcante RG, Sartor MA (2017) annotatr: genomic regions in context. Bioinformatics 33: 2381-2383.

670 53. Shu L, Zhao Y, Kurt Z, Byars SG, Tukiainen T, et al. (2016) Mergeomics: multidimensional data integration  
671 to identify pathogenic perturbations to biological systems. *BMC Genomics* 17: 874.

672 54. Kanehisa M, Goto S (2000) KEGG: kyoto encyclopedia of genes and genomes. *Nucleic Acids Res* 28: 27-30.

673 55. Croft D, Mundo AF, Haw R, Milacic M, Weiser J, et al. (2014) The Reactome pathway knowledgebase.  
674 *Nucleic Acids Res* 42: D472-477.

675 56. Marbach D, Lamparter D, Quon G, Kellis M, Kutalik Z, et al. (2016) Tissue-specific regulatory circuits reveal  
676 variable modular perturbations across complex diseases. *Nat Methods* 13: 366-370.

677 57. Shannon P, Markiel A, Ozier O, Baliga NS, Wang JT, et al. (2003) Cytoscape: a software environment for  
678 integrated models of biomolecular interaction networks. *Genome Res* 13: 2498-2504.

679 58. Welter D, MacArthur J, Morales J, Burdett T, Hall P, et al. (2014) The NHGRI GWAS Catalog, a curated  
680 resource of SNP-trait associations. *Nucleic Acids Res* 42: D1001-1006.

681 59. Meng Q, Zhuang Y, Ying Z, Agrawal R, Yang X, et al. (2017) Traumatic Brain Injury Induces Genome-Wide  
682 Transcriptomic, Methyloomic, and Network Perturbations in Brain and Blood Predicting Neurological Disorders.  
683 *EBioMedicine* 16: 184-194.

684 60. Lewinska M, Juvan P, Perse M, Jeruc J, Kos S, et al. (2014) Hidden disease susceptibility and sexual  
685 dimorphism in the heterozygous knockout of Cyp51 from cholesterol synthesis. *PLoS One* 9: e112787.

686 61. Keber R, Rozman D, Horvat S (2013) Sterols in spermatogenesis and sperm maturation. *J Lipid Res* 54: 20-  
687 33.

688 62. Lou S, Lee HM, Qin H, Li JW, Gao Z, et al. (2014) Whole-genome bisulfite sequencing of multiple  
689 individuals reveals complementary roles of promoter and gene body methylation in transcriptional regulation.  
690 *Genome Biol* 15: 408.

691 63. Faulk C, Kim JH, Anderson OS, Nahar MS, Jones TR, et al. (2016) Detection of differential DNA  
692 methylation in repetitive DNA of mice and humans perinatally exposed to bisphenol A. *Epigenetics* 11: 489-500.



693 64. Acconcia F, Pallottini V, Marino M (2015) Molecular Mechanisms of Action of BPA. *Dose Response* 13:  
694 1559325815610582.

695 65. MacKay H, Abizaid A (2017) A plurality of molecular targets: The receptor ecosystem for bisphenol-A  
696 (BPA). *Horm Behav.*

697 66. Wang J, Sun B, Hou M, Pan X, Li X (2013) The environmental obesogen bisphenol A promotes adipogenesis  
698 by increasing the amount of 11beta-hydroxysteroid dehydrogenase type 1 in the adipose tissue of children. *Int J*  
699 *Obes (Lond)* 37: 999-1005.

700 67. Ahmed S, Atlas E (2016) Bisphenol S- and bisphenol A-induced adipogenesis of murine preadipocytes occurs  
701 through direct peroxisome proliferator-activated receptor gamma activation. *Int J Obes (Lond)* 40: 1566-1573.

702 68. Vafeiadi M, Roumeliotaki T, Myridakis A, Chalkiadaki G, Fthenou E, et al. (2016) Association of early life  
703 exposure to bisphenol A with obesity and cardiometabolic traits in childhood. *Environ Res* 146: 379-387.

704 69. Nishi-Tatsumi M, Yahagi N, Takeuchi Y, Toya N, Takarada A, et al. (2017) A key role of nuclear factor Y in  
705 the refeeding response of fatty acid synthase in adipocytes. *FEBS Lett* 591: 965-978.

706 70. Zhang B, Gaiteri C, Bodea LG, Wang Z, McElwee J, et al. (2013) Integrated systems approach identifies  
707 genetic nodes and networks in late-onset Alzheimer's disease. *Cell* 153: 707-720.

708 71. Marmugi A, Ducheix S, Lasserre F, Polizzi A, Paris A, et al. (2012) Low doses of bisphenol A induce gene  
709 expression related to lipid synthesis and trigger triglyceride accumulation in adult mouse liver. *Hepatology* 55:  
710 395-407.

711 72. Inadera H (2015) Neurological Effects of Bisphenol A and its Analogues. *Int J Med Sci* 12: 926-936.

712 73. Kim JH, Sartor MA, Rozek LS, Faulk C, Anderson OS, et al. (2014) Perinatal bisphenol A exposure promotes  
713 dose-dependent alterations of the mouse methylome. *BMC Genomics* 15: 30.

714 74. Ilagan Y, Mamillapalli R, Goetz LG, Kayani J, Taylor HS (2017) Bisphenol-A exposure in utero programs a  
715 sexually dimorphic estrogenic state of hepatic metabolic gene expression. *Reprod Toxicol* 71: 84-94.

716 75. Ke Z, Pan J, Jin L, Xu H, Yu T, et al. (2016) Bisphenol A exposure may induce hepatic lipid accumulation via  
717 reprogramming the DNA methylation patterns of genes involved in lipid metabolism. *Scientific reports* 6.

718 76. Yang S, Zhang A, Li T, Gao R, Peng C, et al. (2017) Dysregulated Autophagy in Hepatocytes Promotes  
719 Bisphenol A-Induced Hepatic Lipid Accumulation in Male Mice. *Endocrinology* 158: 2799-2812.

720 77. Shimpi PC, More VR, Paranjpe M, Donepudi AC, Goodrich JM, et al. (2017) Hepatic Lipid Accumulation  
721 and Nrf2 Expression following Perinatal and Peripubertal Exposure to Bisphenol A in a Mouse Model of  
722 Nonalcoholic Liver Disease. *Environ Health Perspect* 125: 087005.

723 78. Karlsson O, Baccarelli AA (2016) Environmental Health and Long Non-coding RNAs. *Curr Environ Health*  
724 *Rep* 3: 178-187.

725 79. Somm E, Schwitzgebel VM, Toulotte A, Cederroth CR, Combescure C, et al. (2009) Perinatal exposure to  
726 bisphenol a alters early adipogenesis in the rat. *Environ Health Perspect* 117: 1549-1555.

727 80. Vom Saal FS, Nagel SC, Coe BL, Angle BM, Taylor JA (2012) The estrogenic endocrine disrupting chemical  
728 bisphenol A (BPA) and obesity. *Mol Cell Endocrinol* 354: 74-84.

729 81. Angle BM, Do RP, Ponzi D, Stahlhut RW, Drury BE, et al. (2013) Metabolic disruption in male mice due to  
730 fetal exposure to low but not high doses of bisphenol A (BPA): evidence for effects on body weight, food intake,  
731 adipocytes, leptin, adiponectin, insulin and glucose regulation. *Reprod Toxicol* 42: 256-268.

732 82. Vercruysse P, Vieau D, Blum D, Petersen A, Dupuis L (2018) Hypothalamic alterations in neurodegenerative  
733 diseases and their relation to abnormal energy metabolism. *Frontiers in Molecular Neuroscience* 11: 2.

734 83. MacKay H, Patterson ZR, Abizaid A (2017) Perinatal Exposure to Low-Dose Bisphenol-A Disrupts the  
735 Structural and Functional Development of the Hypothalamic Feeding Circuitry. *Endocrinology* 158: 768-777.

736 84. Jones PA (2012) Functions of DNA methylation: islands, start sites, gene bodies and beyond. *Nat Rev Genet*  
737 13: 484-492.

738 85. Patil V, Ward RL, Hesson LB (2014) The evidence for functional non-CpG methylation in mammalian cells.  
739 *Epigenetics* 9: 823-828.

- 740 86. Oldfield AJ, Yang P, Conway AE, Cinghu S, Freudenberg JM, et al. (2014) Histone-fold domain protein NF-  
741 Y promotes chromatin accessibility for cell type-specific master transcription factors. *Mol Cell* 55: 708-722.
- 742 87. Gracia A, Elcoroaristizabal X, Fernandez-Quintela A, Miranda J, Bediaga NG, et al. (2014) Fatty acid  
743 synthase methylation levels in adipose tissue: effects of an obesogenic diet and phenol compounds. *Genes Nutr* 9:  
744 411.
- 745 88. Hui ST, Parks BW, Org E, Norheim F, Che N, et al. (2015) The genetic architecture of NAFLD among inbred  
746 strains of mice. *Elife* 4.
- 747 89. Dallio M, Masarone M, Errico S, Gravina A, Nicolucci C, et al. (2018) Role of bisphenol A as environmental  
748 factor in the promotion of non-alcoholic fatty liver disease: in vitro and clinical study. *Alimentary pharmacology*  
749 & therapeutics.
- 750 90. Veiga-Lopez A, Kannan K, Liao C, Ye W, Domino SE, et al. (2015) Gender-Specific Effects on Gestational  
751 Length and Birth Weight by Early Pregnancy BPA Exposure. *J Clin Endocrinol Metab* 100: E1394-1403.
- 752

753 **Supporting information captions**

754 S1 Text. Supplemental Methods.

755 S1 Fig. Schematic illustration of MSEA

756 S2 Fig. Schematic illustration (A) and key driver identification algorithms (B) of wKDA.

757 S3 Fig. Body weight of male and female offspring mice at weaning age by litters. Red arrows indicate offspring  
758 male mice selected for molecular profiling.

759 S4 Fig. Prenatal BPA exposure induced expression change for genes from the adipocyte differentiation,  
760 triglyceride biosynthesis, glucose metabolism, and core histone genes in the adipose tissue. P-values for  
761 enrichment of pathway genes among DEGs (shown in parenthesis in each panel heading) were determined by  
762 MSEA. \* $p < 0.05$  in differential expression tests for individual genes by DEseq2; \*\*FDR < 5% in differential  
763 expression tests for individual genes by DEseq2.

764 S5 Fig. Gene body location distribution for hyper- and hypo- methylated DMC s in adipose, hypothalamus, and  
765 liver.

766 S6 Fig. Quantile-quantile plots for the absolute Pearson correlation with local DMC for DEGs and Non DEGs in  
767 adipose, hypothalamus, and liver tissue. Statistical difference of the distribution of correlation value between  
768 DEGs (FDR < 5%) and non DEGs is determined by the Kolmogorov–Smirnov test.

769 S7 Fig. Scatter plots of correlations between DEG expression levels and DMC methylation ratios for *Slc25a1* in  
770 adipose, *Mvk* in hypothalamus, and *Gm20319* in liver.

771 S1 Table. Data resources and references for the construction of Bayesian gene-gene regulatory networks.

772 S2 Table. Source of publicly available full summary-level statistics from human genome-wide association studies.

773 S3 Table. List of DEGs with  $p < 0.05$  in adipose, hypothalamus and liver tissue following prenatal exposure to  
774 BPA.

775 S4 Table. Count of DEGs in adipose, hypothalamus and liver tissue following prenatal exposure to BPA.

776 S5 Table. Results of functional annotation of DEGs in in adipose, hypothalamus and liver tissue following  
777 prenatal exposure to BPA

778 S6 Table. Count of differentially methylated regions in hypothalamus and liver tissue following prenatal exposure  
779 to BPA.

780 S7 Table. Results of functional annotation of DMCs in in adipose, hypothalamus and liver tissue following  
781 prenatal exposure to BPA.

782 S8 Table. List of pairs of DEGs and local DMCs with significant correlation ( $p < 0.05$ ) in expression level and  
783 methylation ratio

784 S9 Table. List of transcription factors whose downstream targets were significantly enriched for DEGs ( $p < 0.05$ ).

785 S10 Table. List of tissue-specific key drivers with  $FDR < 1\%$

786 S11 Table. List of DEGs with significant correlation between expression level, methylation ratio of local DMCs,  
787 and cardiometabolic traits ( $p < 0.05$ ).

788 **Tables**

789 Table 1. Top 5 human traits whose associated genes in genome-wide association studies are enriched for  
 790 differentially methylated CpGs (DMCs) across adipose, hypothalamus and liver at FDR < 1% in MSEA.

| <b>Human trait</b>                 | <b>Adipose</b> |            | <b>Hypothalamus</b> |            | <b>Liver</b> |            |
|------------------------------------|----------------|------------|---------------------|------------|--------------|------------|
|                                    | <b>P</b>       | <b>FDR</b> | <b>P</b>            | <b>FDR</b> | <b>P</b>     | <b>FDR</b> |
| Obesity-related traits             | 1.28E-16       | 0.00%      | 3.03E-15            | 0.00%      | 2.71E-19     | 0.00%      |
| Body mass index                    | 1.30E-13       | 0.00%      | 3.74E-07            | 0.00%      | 9.66E-12     | 0.00%      |
| Post bronchodilator FEV1/FVC ratio | 8.17E-09       | 0.00%      | 1.45E-08            | 0.00%      | 3.67E-07     | 0.00%      |
| Type 2 diabetes                    | 1.21E-05       | 0.03%      | 8.97E-09            | 0.00%      | 0.001243     | 0.92%      |
| Platelet distribution width        | 8.16E-08       | 0.00%      | 7.62E-05            | 0.16%      | 5.20E-05     | 0.12%      |

791 **Figures**

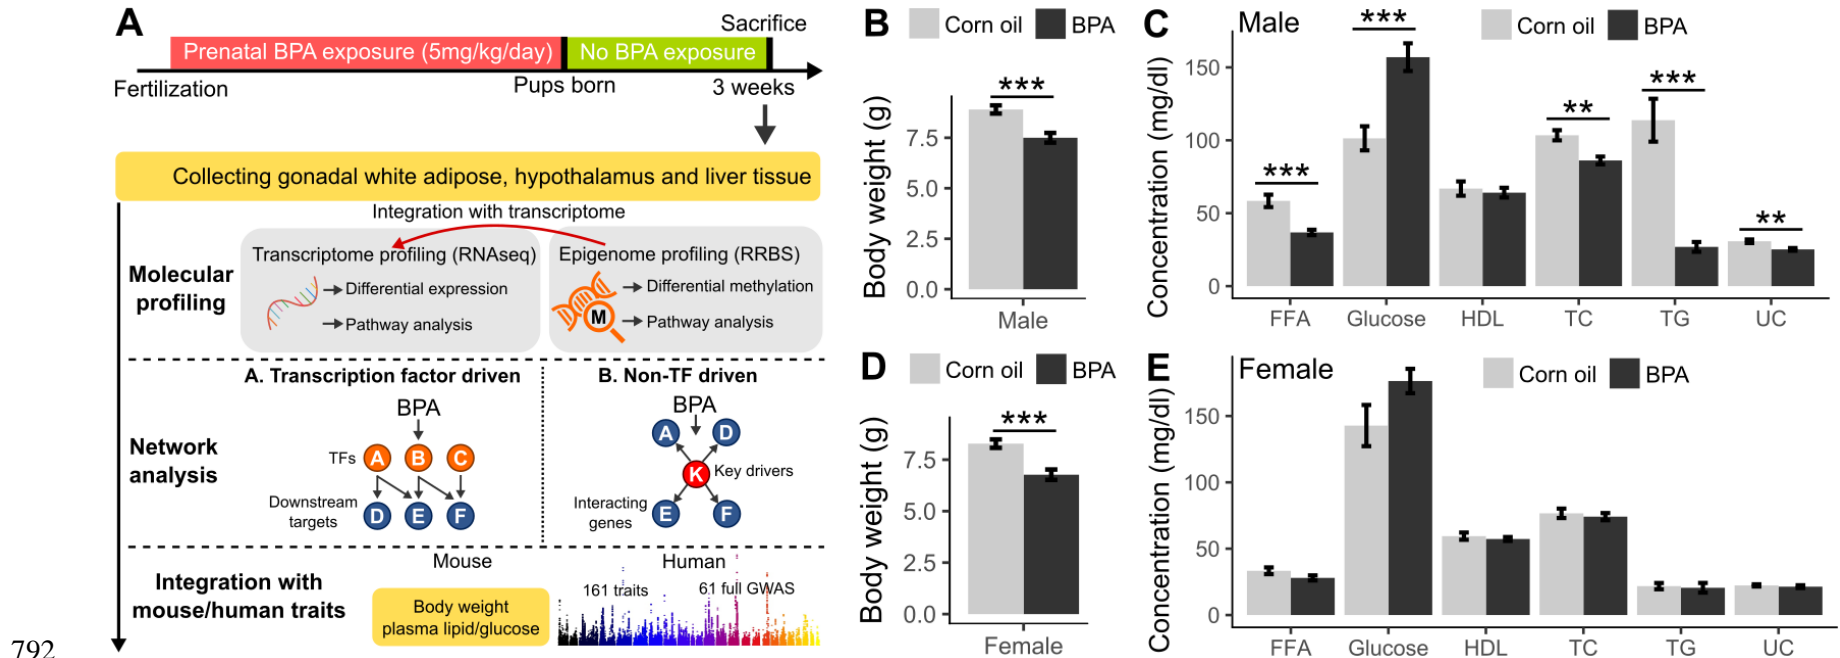

792

793 **Fig 1. Overall study design and the measurements of metabolic traits in male and female offspring.** (A) Framework of multi-omics  
 794 approaches to investigate the impact of prenatal BPA exposure. B-C) Comparison of body weight, serum lipids and glucose level in male mice at  
 795 weaning age. D-E) Comparison of body weight, serum lipids and glucose level in female mice at weaning age. FFA: free fatty acid; HDL: high-  
 796 density lipoprotein cholesterol; TC: total cholesterol; TG: triglyceride; UC: unesterified cholesterol. \*  $p < 0.05$ , \*\*  $p < 0.01$ , \*\*\*  $p < 0.001$  by two-  
 797 sided Student's T-test. N=9-13 mice/group.

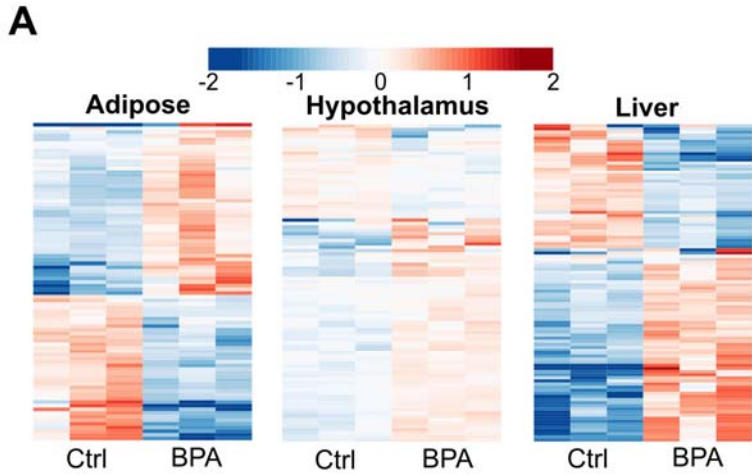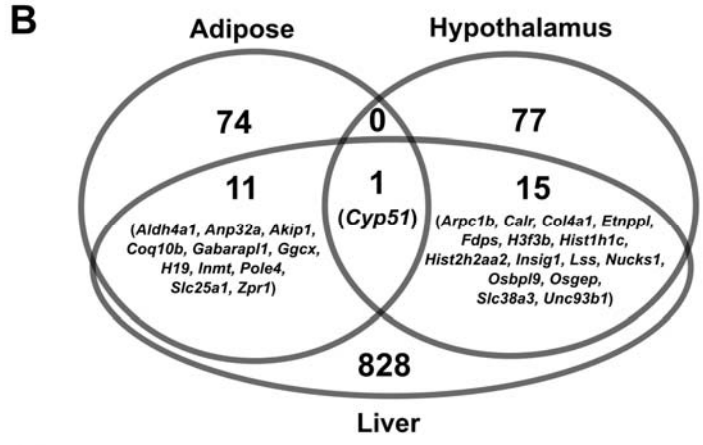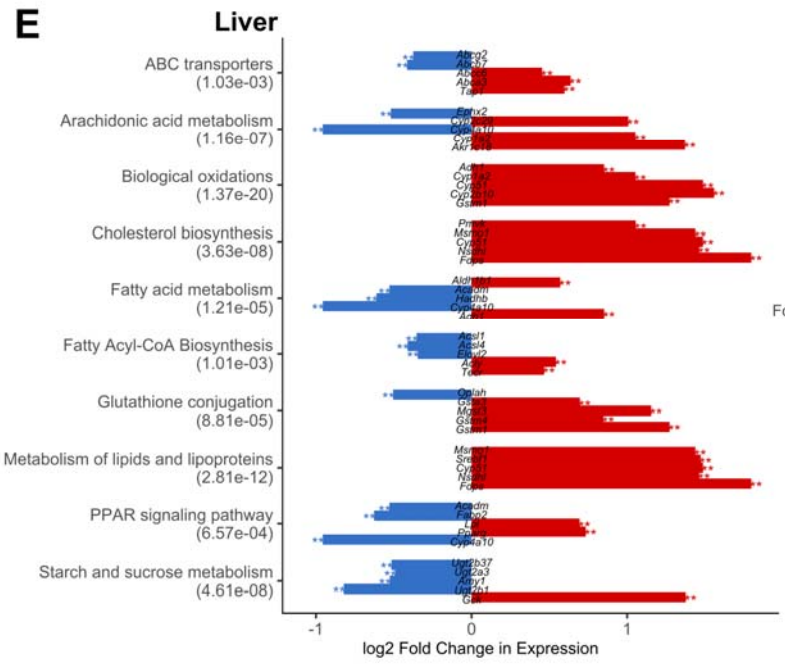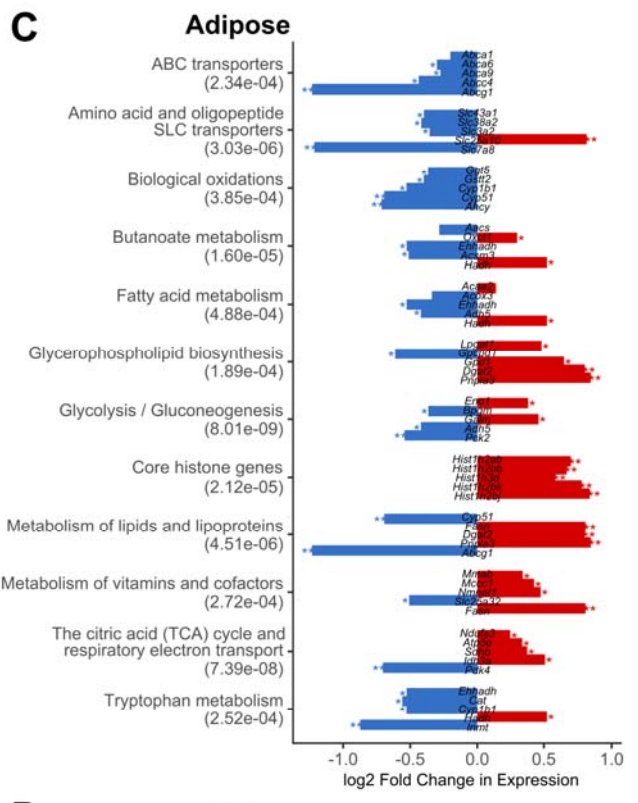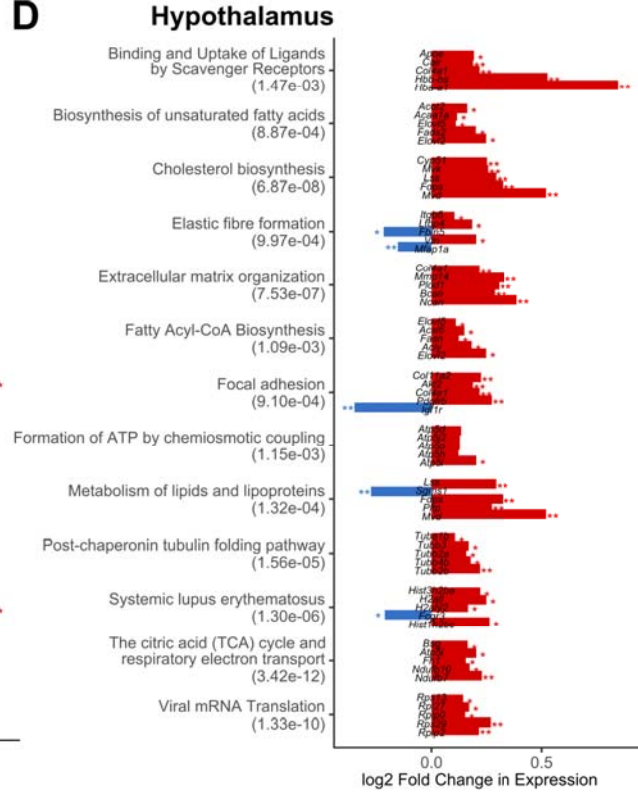



799 **Fig 2. Prenatal BPA exposure induced transcriptomic alterations in adipose, hypothalamus and liver.** (A)  
800 Heatmap of expression changes in adipose, hypothalamus and liver for the top 100 differentially expressed genes  
801 (DEGs) affected by BPA. Color indicates fold change of expression, with red and blue indicating upregulation  
802 and downregulation by BPA. (B) Venn Diagram demonstrating tissue-specific and shared DEGs between tissues.  
803 (C-E) Significantly enriched pathways (FDR < 5%) among DEGs from each tissue. Enrichment p-value (shown in  
804 parenthesis following the name of functional annotation) is determined by MSEA. The fold change and statistical  
805 significance for the top 5 differentially expressed genes in each pathway are shown. \*,  $p < 0.05$ ; \*\*, FDR < 5% in  
806 differential expression analysis using DEseq2.

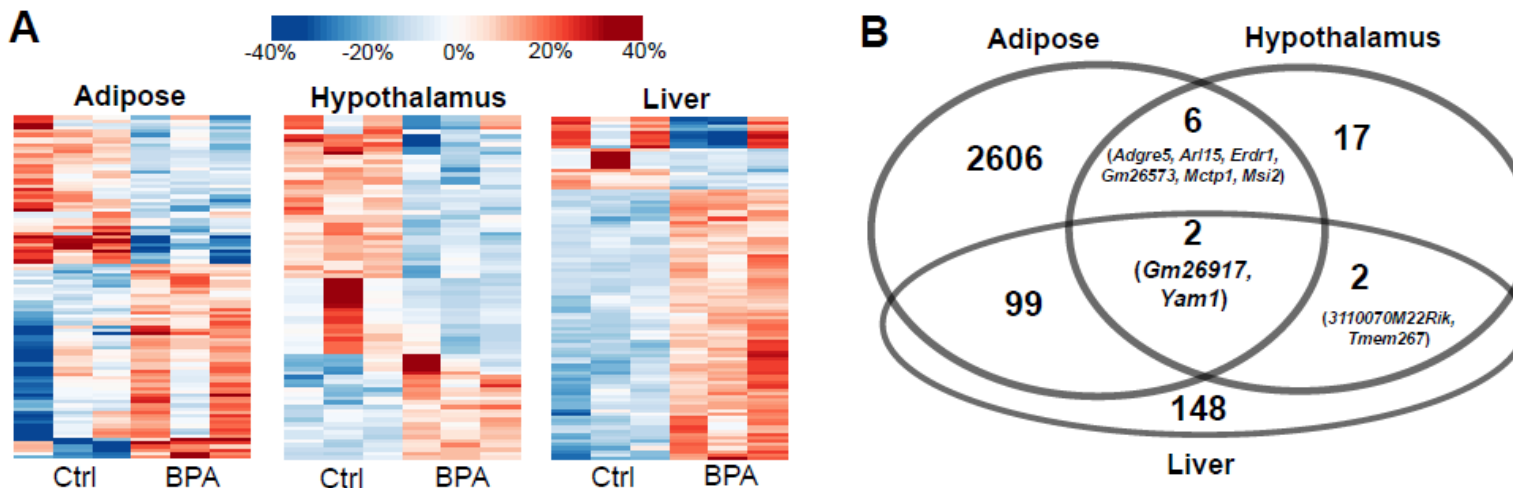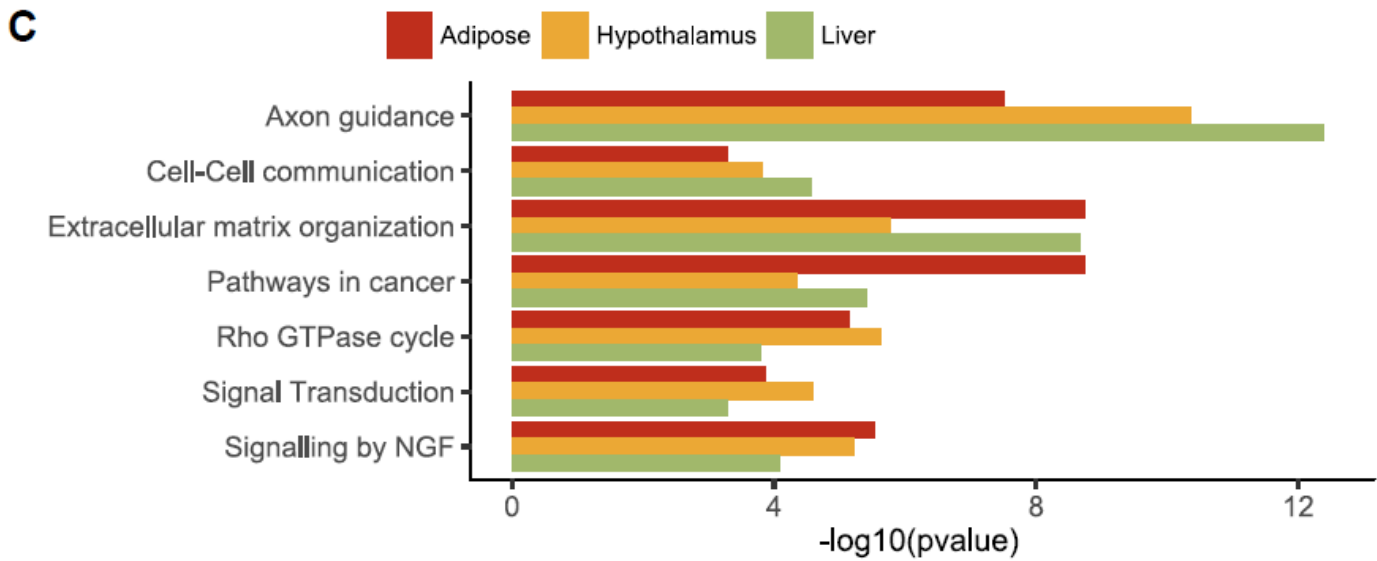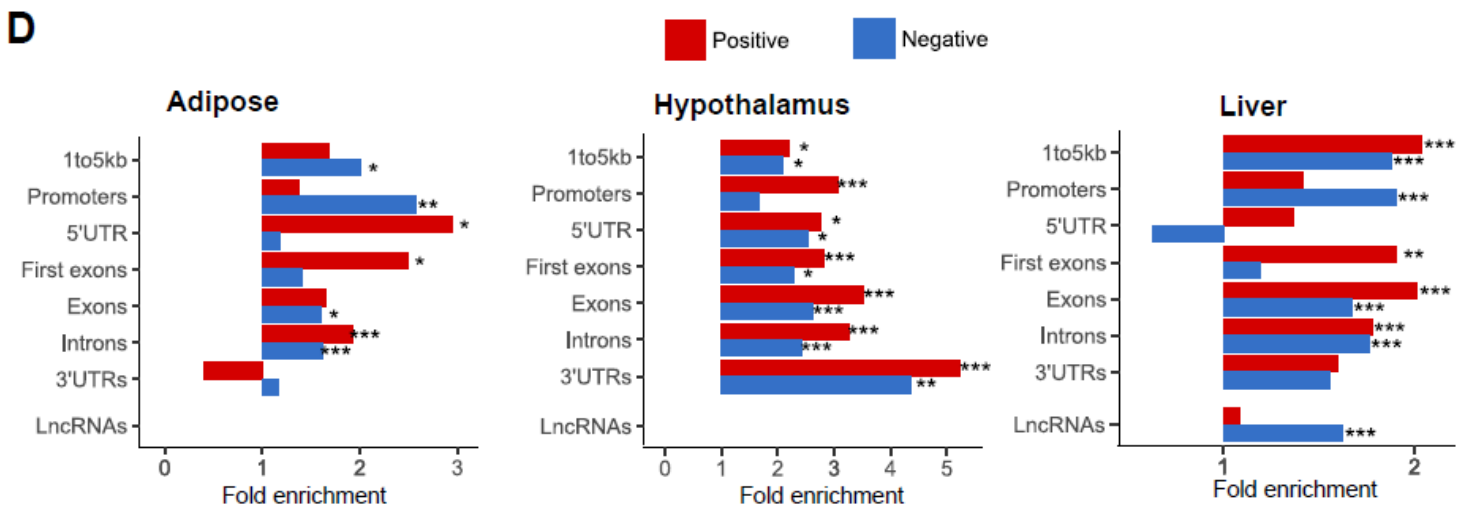

808 **Fig 3. Prenatal BPA exposure induced methylomic level alteration in adipose, hypothalamus and liver.** (A)  
809 Heatmap of methylation level changes for the top 100 differentially methylated CpGs (DMCs). Color indicates  
810 change in methylation ratio, with red and blue indicating upregulation and downregulation by BPA. (B) Venn  
811 Diagram of genes with local DMCs between tissues shows tissue-specific and shared genes mapped to DMCs. (C)  
812 Significantly enriched pathways that satisfied  $FDR < 1\%$  across DMCs from adipose, hypothalamus, and liver  
813 tissues. Enrichment p-value is determined by MSEA. (D) Fold enrichment for positive correlations (red bars) or  
814 negatively correlations (blue bars) between DMCs and local DEGs, assessed by different gene regions. \*,  $p <$   
815  $0.05$ ; \*\*,  $p < 0.01$ ; \*\*\*,  $p < 0.0001$ ; enrichment p-values were determined using Fisher's exact test.

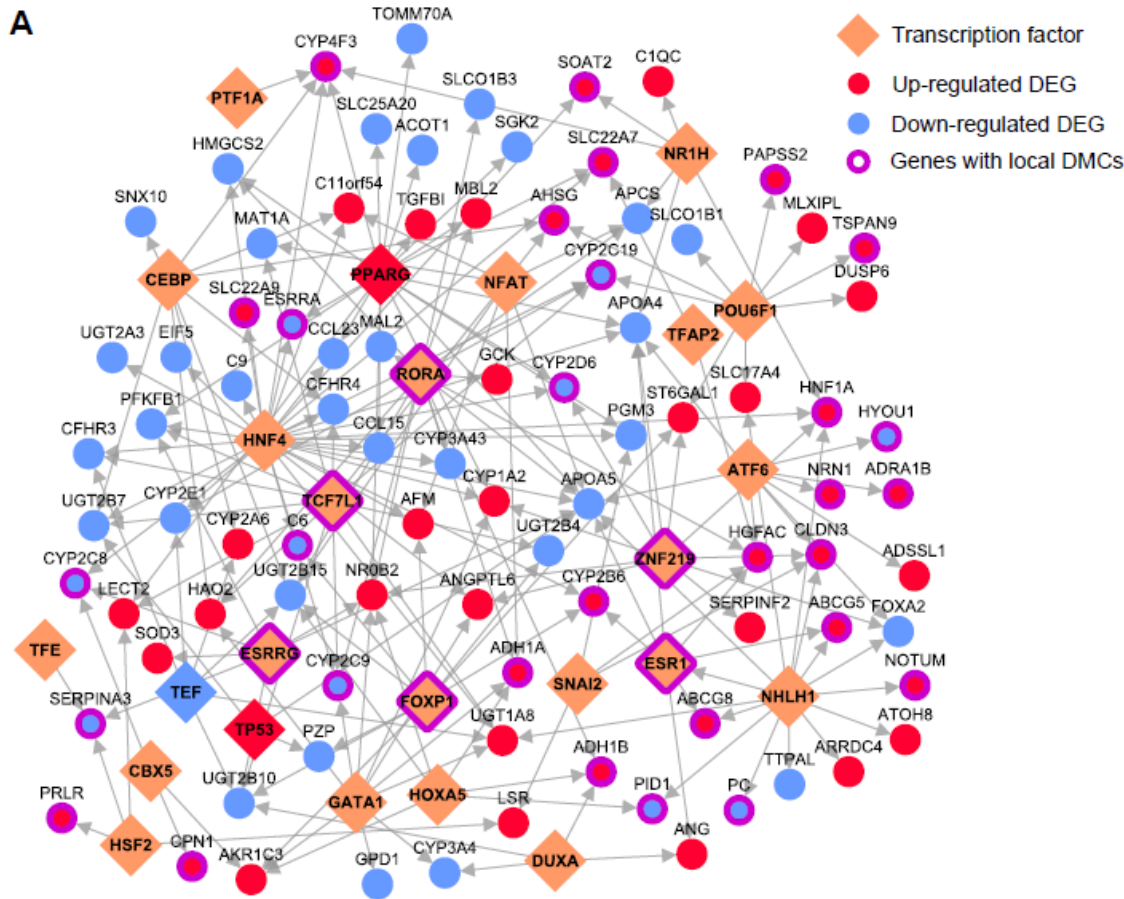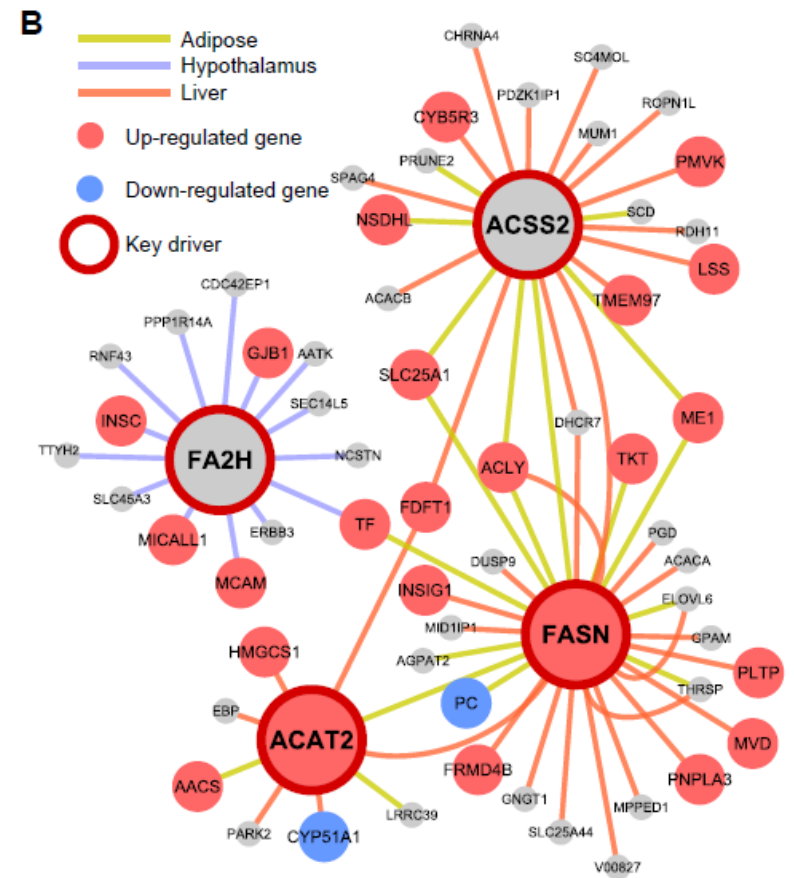

816 **Fig 4. Transcription factors and key drivers orchestrate BPA induced gene expression level changes.** (A) Liver transcription factor  
 817 regulatory networks for the top ranked transcription factors (FDR < 5%) based on enrichment of liver DEGs among TF downstream targets.  
 818 Network topology was based on FANTOM5. For TFs with > 20% overlapping downstream targets, only the TF with the lowest FDR is shown. (B)  
 819 Gene-gene regulatory subnetworks (Bayesian networks) for cross-tissue key drivers. Network topology was based on Bayesian network modeling

820 of each tissue using genetic and transcriptome datasets from mouse and human populations. For each tissue, if  $\geq 2$  datasets were available for a  
821 given tissue, a network for each dataset was constructed and a consensus network was derived by keeping only the high confidence network edges  
822 between genes (edges appearing in  $\geq 2$  studies).

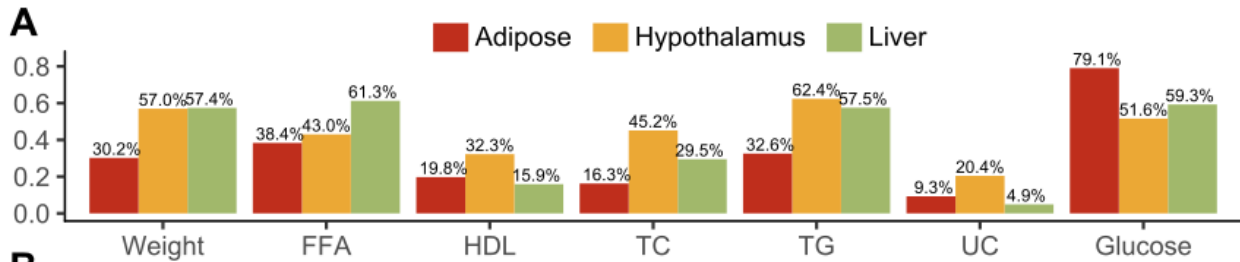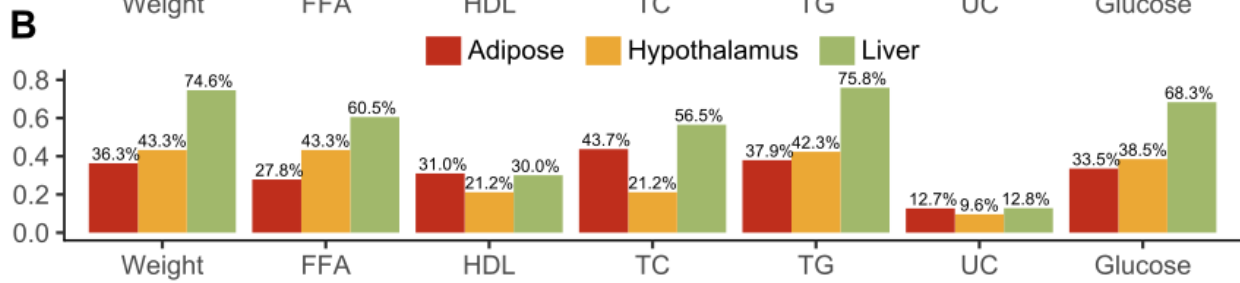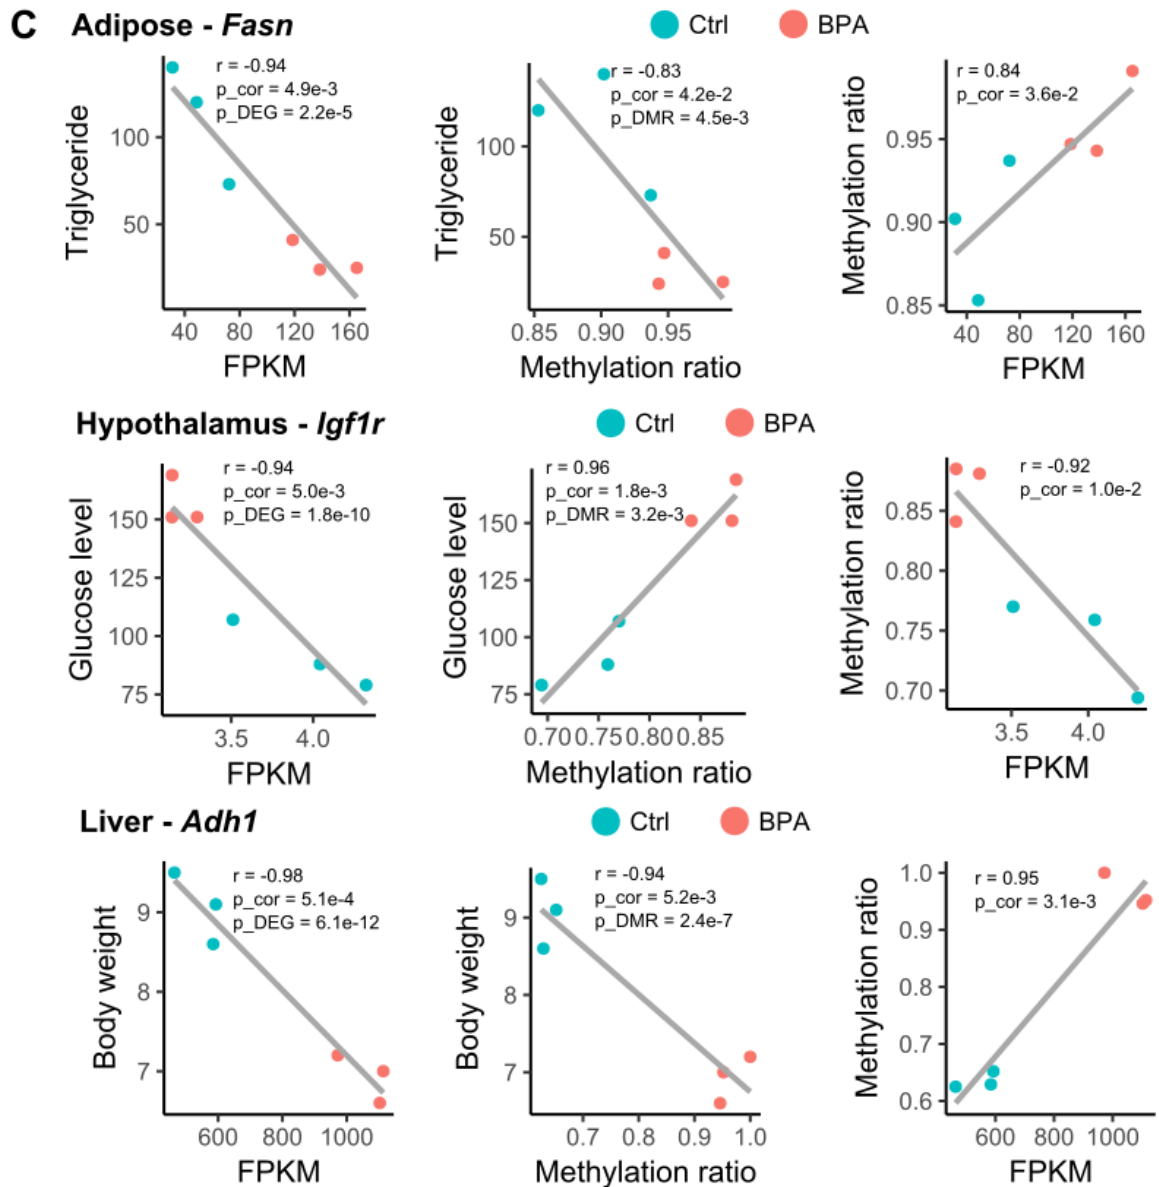

824 **Fig 5. Correlation between gene expression, methylation and metabolic traits.** (A) Percentage of tissue-  
825 specific DEGs that are correlated with metabolic traits ( $p < 0.05$ ). (B) Percentage of tissue-specific DMCs that are  
826 correlated with metabolic traits ( $p < 0.05$ ). (A-B) p-values were determined using Pearson correlation test. (C)  
827 Pair-wise correlation between expression level, methylation ratio and metabolic profiles (triglyceride, glucose  
828 level, body weight) for *Fasn*, *Igf1r* and *Adh1*.  $P_{cor}$ , p-value was determined using Pearson correction test;  
829  $P_{DEG}$  was determined using differential expression test;  $P_{DMC}$  was determined using differential methylation  
830 test.

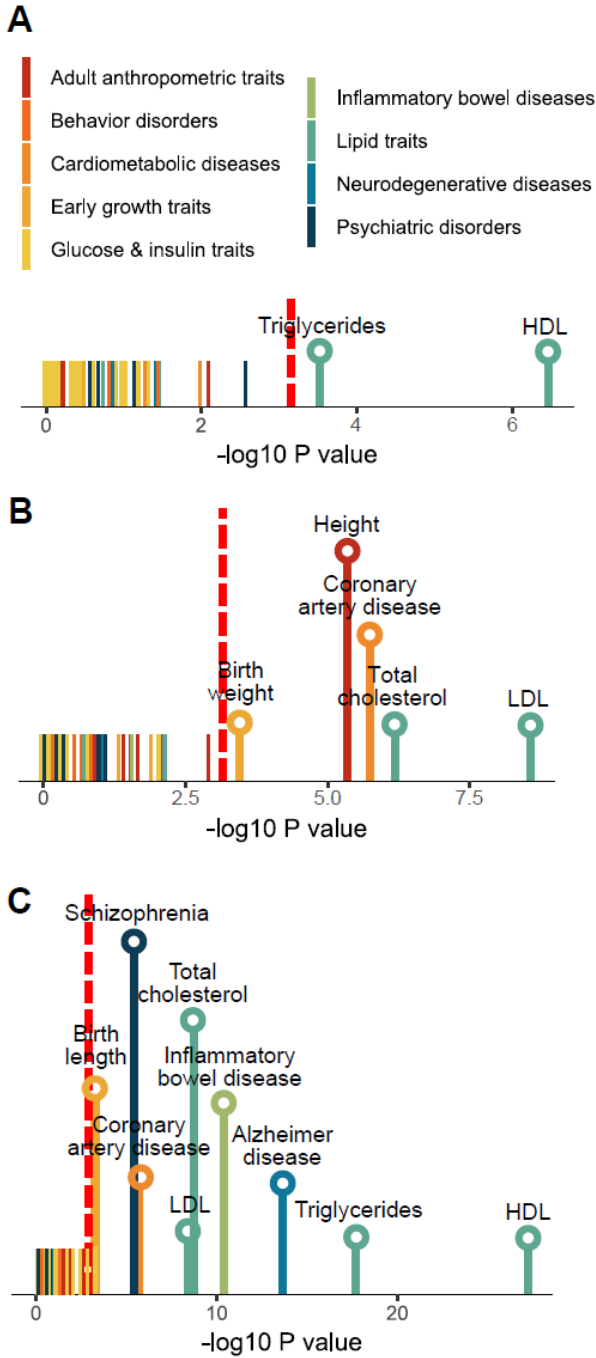

831

832

833

834

835

**Fig 6. Association of differential expression signatures from adipose (A), hypothalamus (B) and liver (C) with 61 human traits/diseases, color coded into nine primary categories. P-values are determined using MSEA. Red dashed line indicates the cutoff for Bonferroni-corrected  $p = 0.05$ . Names of traits/diseases whose p-values didn't pass Bonferroni-corrected cutoff were not shown.**
